# Supplementary material for: Polymerization of ethylene and propylene promoted by group 4 metal complexes bearing thioetherphenolate ligands
Source: Royal Society of Chemistry journal article supplement (doi:10.1039/c5py00488h), 2015-01-01
Supplement: c5py00488h1.pdf [file c5py00488h1.pdf]

ELECTRONIC SUPPLEMENTARY INFORMATION (ESI)

---

**Polymerization of Ethylene and Propylene  
Promoted by Group 4 Metal Complexes Bearing  
Thioetherphenolate Ligands**

Ermanno Luciano,<sup>a</sup> Francesco Della Monica,<sup>a</sup> Antonio Buonerba,<sup>a</sup> Alfonso Grassi,<sup>a</sup>  
Carmine Capacchione<sup>a\*</sup> and Stefano Milione<sup>a</sup>

<sup>a</sup> *Dipartimento di Chimica e Biologia and NANOMATES Research Centre for NANOMaterials and nanoTEchnology, Università degli Studi di Salerno, via Giovanni Paolo II 132 - 84084 Fisciano (SA).*

\* *E-mail:* [ccapacchione@unisa.it](mailto:ccapacchione@unisa.it).

## Table of Contents

|                                                                                                                                                                                                                                                                                                                              |    |
|------------------------------------------------------------------------------------------------------------------------------------------------------------------------------------------------------------------------------------------------------------------------------------------------------------------------------|----|
| <b>Figure S1.</b> $^1\text{H}$ NMR spectrum ( $\text{CD}_2\text{Cl}_2$ , 25 °C, 600 MHz) of complex $(^t\text{-BuOS})_2\text{TiCl}_2$ ( <b>1</b> ).....                                                                                                                                                                      | 3  |
| <b>Figure S2.</b> $^{13}\text{C}$ NMR spectrum ( $\text{CD}_2\text{Cl}_2$ , 25 °C, 100 MHz) of complex $(^t\text{-BuOS})_2\text{TiCl}_2$ ( <b>1</b> ).....                                                                                                                                                                   | 3  |
| <b>Figure S3.</b> VT- $^1\text{H}$ NMR spectra ( $\text{CD}_2\text{Cl}_2$ , 600 MHz) of complex $(^t\text{-BuOS})_2\text{TiCl}_2$ ( <b>1</b> ).....                                                                                                                                                                          | 4  |
| <b>Figure S4.</b> $^1\text{H}$ NMR spectrum ( $\text{CDCl}_3$ , 25 °C, 400 MHz) of complex $(^{\text{Cum}}\text{OS})_2\text{TiCl}_2$ ( <b>2</b> ).....                                                                                                                                                                       | 5  |
| <b>Figure S5.</b> $^{13}\text{C}$ NMR spectrum ( $\text{CDCl}_3$ , 25 °C, 75 MHz) of complex $(^{\text{Cum}}\text{OS})_2\text{TiCl}_2$ ( <b>2</b> ). .....                                                                                                                                                                   | 5  |
| <b>Figure S6.</b> $^1\text{H}$ NMR spectrum ( $\text{CD}_2\text{Cl}_2$ , 25 °C, 400 MHz) of complex $(^t\text{-BuOS})_2\text{ZrBn}_2$ ( <b>3</b> ).....                                                                                                                                                                      | 6  |
| <b>Figure S7.</b> $^{13}\text{C}$ NMR spectrum ( $\text{CD}_2\text{Cl}_2$ , 25 °C, 100 MHz) of complex $(^t\text{-BuOS})_2\text{ZrBn}_2$ ( <b>3</b> ). .....                                                                                                                                                                 | 6  |
| <b>Figure S8.</b> $^1\text{H}$ - $^1\text{H}$ NOESY spectrum of complex $(^t\text{-BuOS})_2\text{ZrBn}_2$ ( <b>3</b> ) at room temperature. ....                                                                                                                                                                             | 7  |
| <b>Figure S9a.</b> VT- $^1\text{H}$ NMR spectra ( $\text{CD}_2\text{Cl}_2$ , 400 MHz) of complex $(^t\text{-BuOS})_2\text{ZrBn}_2$ ( <b>3</b> ). .....                                                                                                                                                                       | 8  |
| <b>Figure S9b.</b> VT- $^1\text{H}$ NMR spectra ( $\text{CD}_2\text{Cl}_2$ , 400 MHz) of complex $(^t\text{-BuOS})_2\text{ZrBn}_2$ ( <b>3</b> ) in the region from 0.7 to 3.1 ppm.....                                                                                                                                       | 8  |
| <b>Figure S10.</b> COSY spectrum ( $\text{CD}_2\text{Cl}_2$ , 600MHz) of complex $(^t\text{-BuOS})_2\text{ZrBn}_2$ ( <b>3</b> ) showing the scalar coupling of the Zr- $\text{CH}_2$ -Ph resonances at -80 °C.....                                                                                                           | 9  |
| <b>Figure S11.</b> $^1\text{H}$ - $^1\text{H}$ NOESY spectrum ( $\text{CD}_2\text{Cl}_2$ , 600 MHz) of complex $(^t\text{-BuOS})_2\text{ZrBn}_2$ ( <b>3</b> ) at -80 °C. 10                                                                                                                                                  |    |
| <b>Figure S12.</b> $^1\text{H}$ - $^{13}\text{C}$ HSQC spectrum ( $\text{CD}_2\text{Cl}_2$ , 600 MHz) of complex $(^t\text{-BuOS})_2\text{ZrBn}_2$ ( <b>3</b> ) at -80 °C.. 11                                                                                                                                               |    |
| <b>Figure S13.</b> $^1\text{H}$ NMR spectrum ( $\text{CD}_2\text{Cl}_2$ , 25 °C, 400 MHz) of complex $(^{\text{Cum}}\text{OS})_2\text{ZrBn}_2$ ( <b>4</b> ). .....                                                                                                                                                           | 12 |
| <b>Figure S14.</b> $^{13}\text{C}$ NMR spectrum ( $\text{CD}_2\text{Cl}_2$ , 25 °C, 75 MHz) of complex $(^{\text{Cum}}\text{OS})_2\text{ZrBn}_2$ ( <b>4</b> ). .....                                                                                                                                                         | 12 |
| <b>Table S1.</b> Internal and Free Energy differences (kcal/mol) of the minimum energy structures for the five diastereoisomers of the $(\text{OS})_2\text{MX}_2$ complexes (M = Ti, X = Cl; M = Zr, X = Me). .....                                                                                                          | 13 |
| <b>Figure S15.</b> The opening ( $\kappa^2 \rightarrow \kappa^1$ ) of one of the OS ligands in the titanium and zirconium $(\text{OS})_2\text{TiCl}_2$ and $(\text{OS})_2\text{ZrMe}_2$ complexes. The stereoisomers C and A were considered as starting species for the titanium and zirconium complexes, respectively..... | 14 |
| <b>Figure S16.</b> $^{13}\text{C}$ NMR spectrum (TCDE, 110°C, 75 MHz) of polyethylene of run 1, Table 1.....                                                                                                                                                                                                                 | 15 |
| <b>Figure S17.</b> Aliphatic region of $^{13}\text{C}$ NMR spectrum (TCDE, 110°C, 75 MHz) of polypropylene sample of run 1 in Table 2. ....                                                                                                                                                                                  | 16 |
| <b>Table S2.</b> $^{13}\text{C}$ NMR chemical shift of polypropylene sample and the corresponding literature values for regioirregular polypropylene. <sup>1</sup> .....                                                                                                                                                     | 17 |
| <b>Figure S18.</b> Possible modes of 2,1 insertion during the propylene polymerization. ....                                                                                                                                                                                                                                 | 18 |
| <b>Figure S19</b> $^{13}\text{C}$ NMR spectra (TCDE, 110 °C, 75 MHz) of polypropylene samples of run 4 (a) and 1 (b) Table 2.....                                                                                                                                                                                            | 19 |
| <b>Figure S20.</b> DSC thermograms for polypropylene samples of run 1 (a) and 4 (b) Table 2.....                                                                                                                                                                                                                             | 20 |
| <b>Figure S21.</b> $^1\text{H}$ NMR spectrum ( $\text{CDCl}_3$ , 25 °C, 300 MHz) of oligomers obtained from the run 2 Table 2.....                                                                                                                                                                                           | 21 |
| <b>Figure S22.</b> $^1\text{H}$ NMR spectrum ( $\text{CDCl}_3$ , 25 °C, 300 MHz) of oligomers obtained from the run 3 Table 2.....                                                                                                                                                                                           | 21 |
| <b>Figure S23.</b> Aliphatic region of $^{13}\text{C}$ NMR spectrum ( $\text{CDCl}_3$ , 25 °C, 75 MHz) of oligomers obtained from the run 2 Table 2.....                                                                                                                                                                     | 22 |
| <b>Figure S24.</b> Aliphatic region of $^{13}\text{C}$ NMR spectrum ( $\text{CDCl}_3$ , 25 °C, 75.5 MHz) of oligomers obtained from the run 3 Table 2.....                                                                                                                                                                   | 22 |
| <b>Figure S25.</b> $^{13}\text{C}$ NMR spectra ( $\text{CDCl}_3$ , 25 °C, 75 MHz) of oligomers samples of run 5 (a) and 2 (b) Table 2.....                                                                                                                                                                                   | 23 |
| <b>Figure S26.</b> GC trace of the oligomers sample from run 2 Table 2. ....                                                                                                                                                                                                                                                 | 24 |
| <b>Figure S27.</b> Schulz-Flory distribution of oligomers sample of run 2 Table 2. (R = 0.969).....                                                                                                                                                                                                                          | 25 |
| <b>Figure S28.</b> Schulz-Flory distribution of oligomers sample of run 3 Table 2. (R = 0.979).....                                                                                                                                                                                                                          | 25 |
| <b>References</b> .....                                                                                                                                                                                                                                                                                                      | 26 |

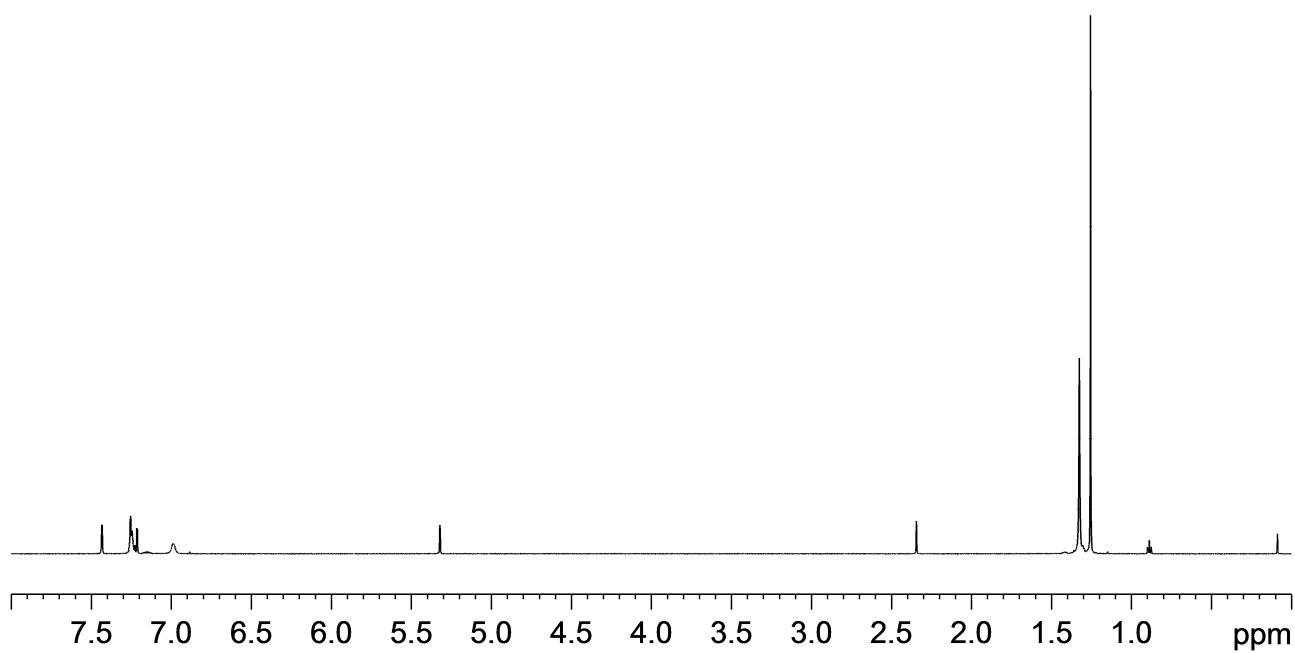

**Figure S1.**  $^1\text{H}$  NMR spectrum ( $\text{CD}_2\text{Cl}_2$ , 25 °C, 600 MHz) of complex  $(^t\text{-BuOS})_2\text{TiCl}_2$  (**1**).

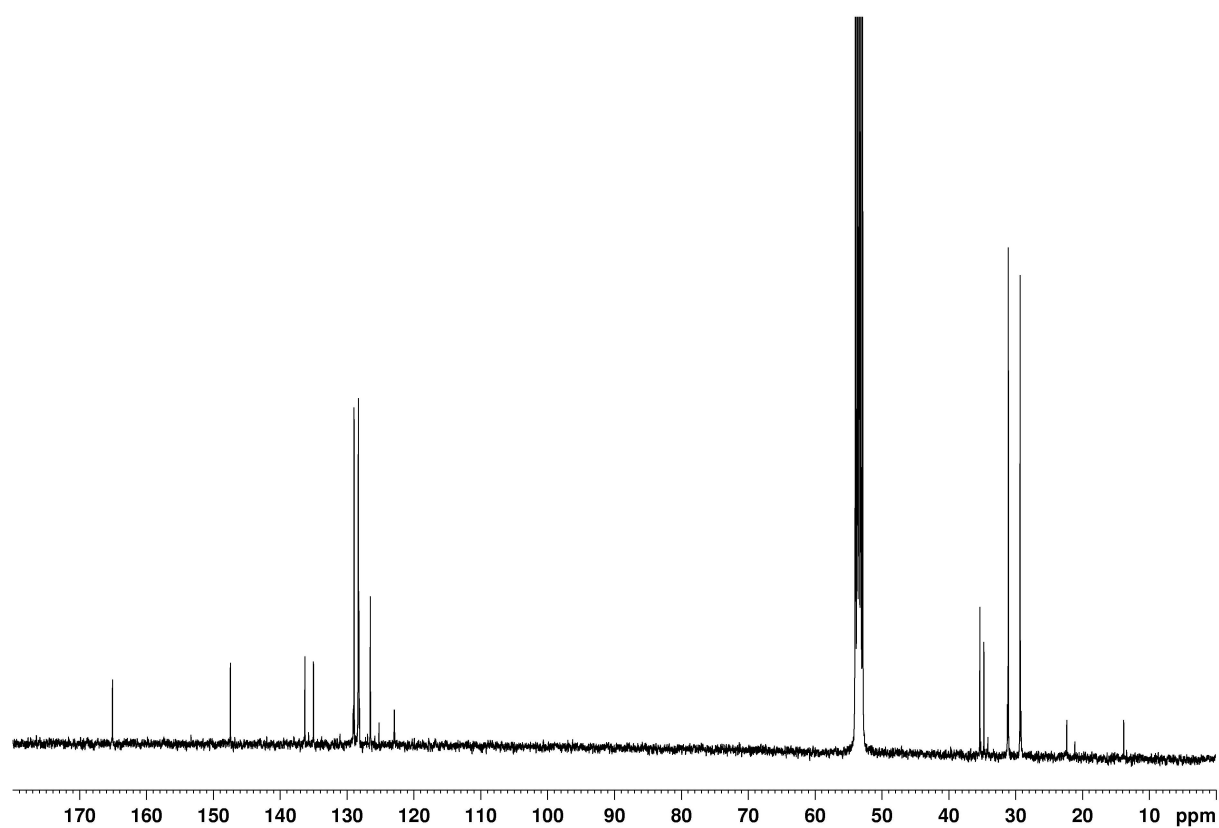

**Figure S2.**  $^{13}\text{C}$  NMR spectrum ( $\text{CD}_2\text{Cl}_2$ , 25 °C, 100 MHz) of complex  $(^t\text{-BuOS})_2\text{TiCl}_2$  (**1**).

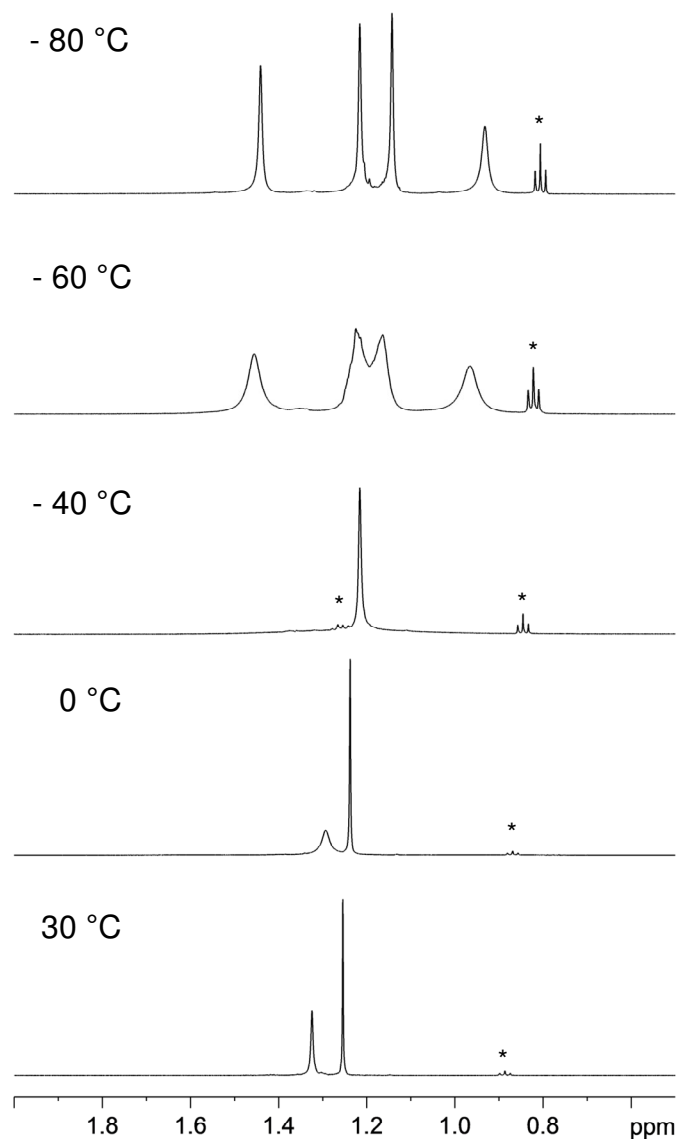

**Figure S3.** Variable-temperature  $^1\text{H}$  NMR spectra ( $\text{CD}_2\text{Cl}_2$ , 600 MHz) of complex  $(^t\text{BuOS})_2\text{TiCl}_2$  (1). The signals marked with an asterisk are due to pentane impurity.

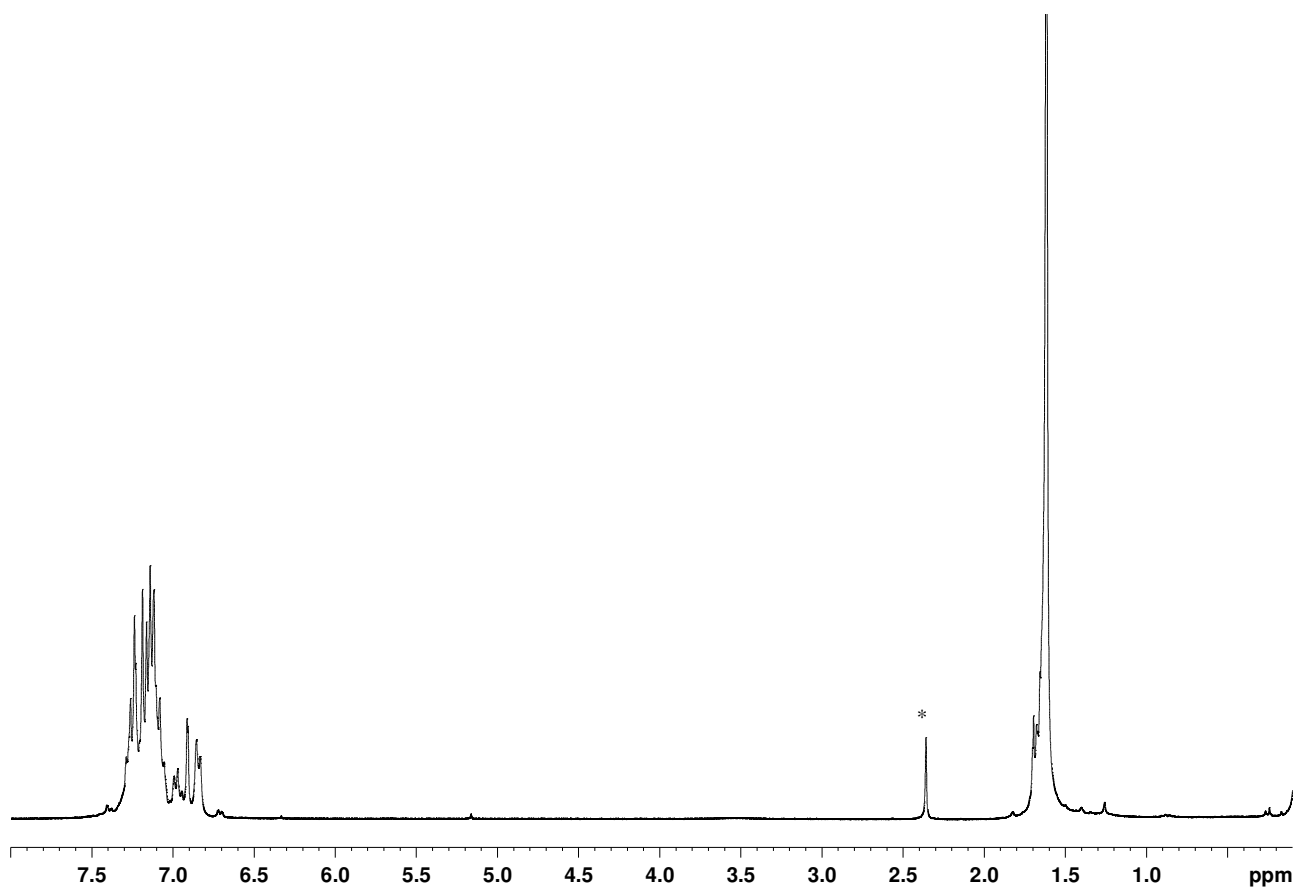

**Figure S4.**  $^1\text{H}$  NMR spectrum ( $\text{CDCl}_3$ , 25 °C, 400 MHz) of complex  $(^{\text{Cum}}\text{OS})_2\text{TiCl}_2$  (**2**) (\* = toluene).

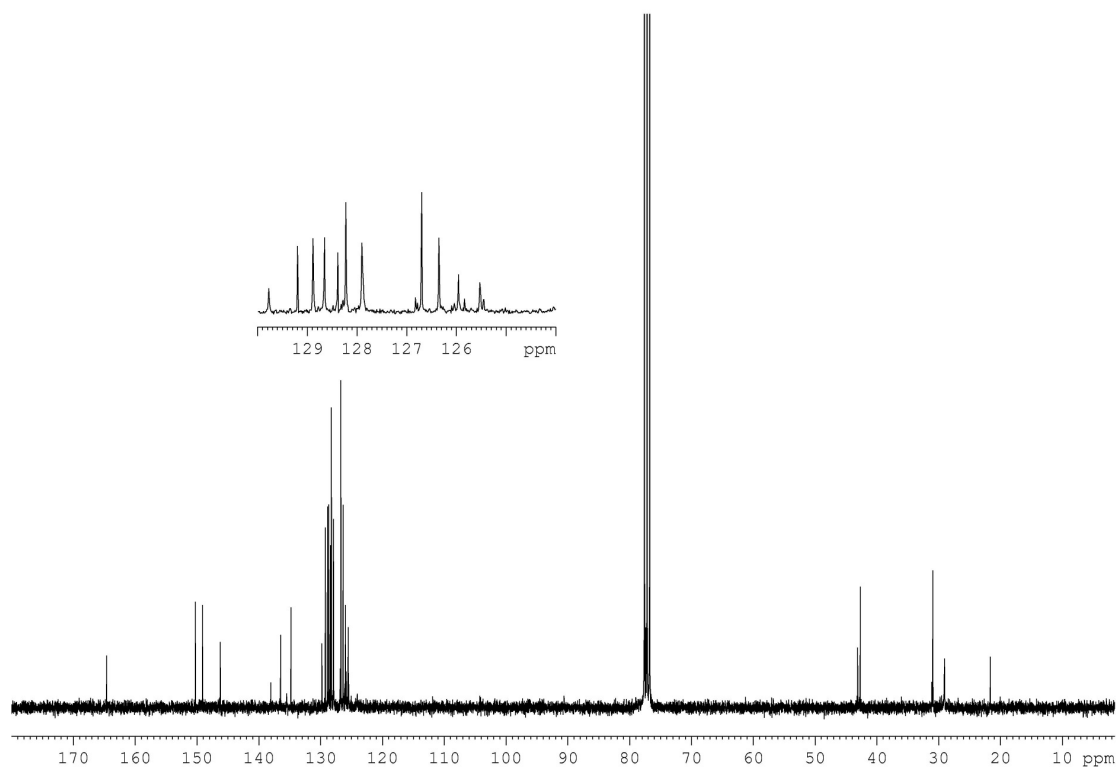

**Figure S5.**  $^{13}\text{C}$  NMR spectrum ( $\text{CDCl}_3$ , 25 °C, 75 MHz) of complex  $(^{\text{Cum}}\text{OS})_2\text{TiCl}_2$  (**2**).

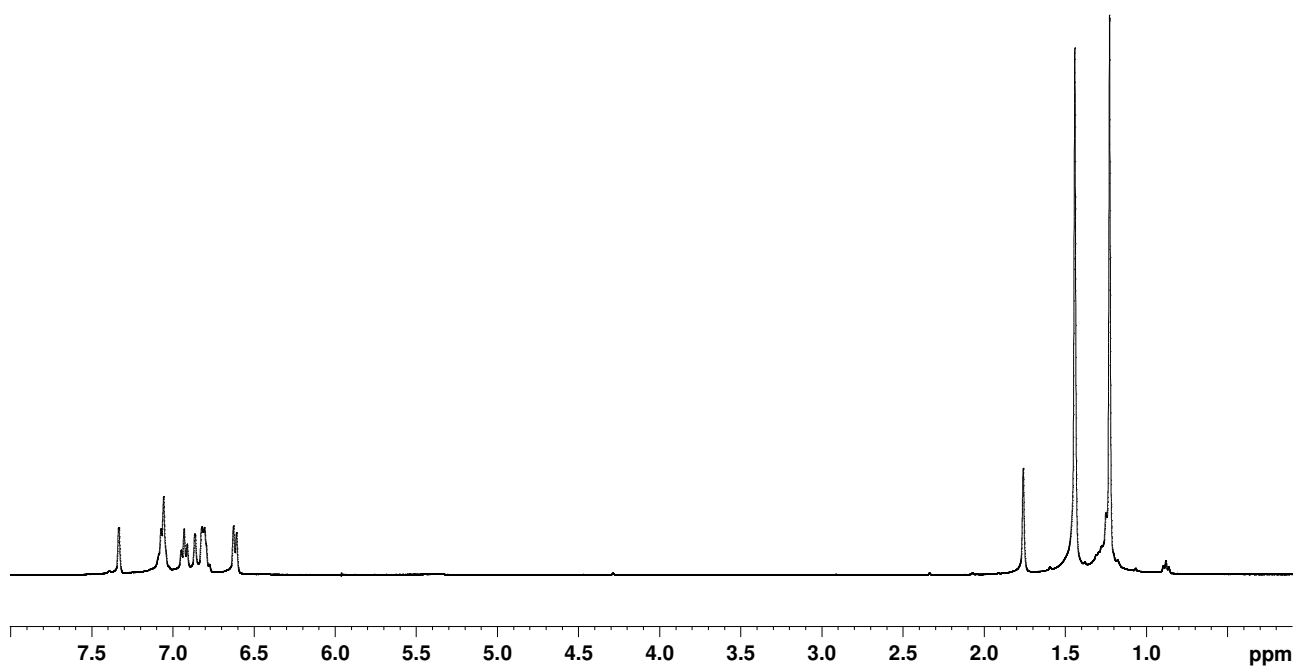

**Figure S6.**  $^1\text{H}$  NMR spectrum ( $\text{CD}_2\text{Cl}_2$ , 25 °C, 400 MHz) of complex  $(^t\text{-BuOS})_2\text{ZrBn}_2$  (**3**).

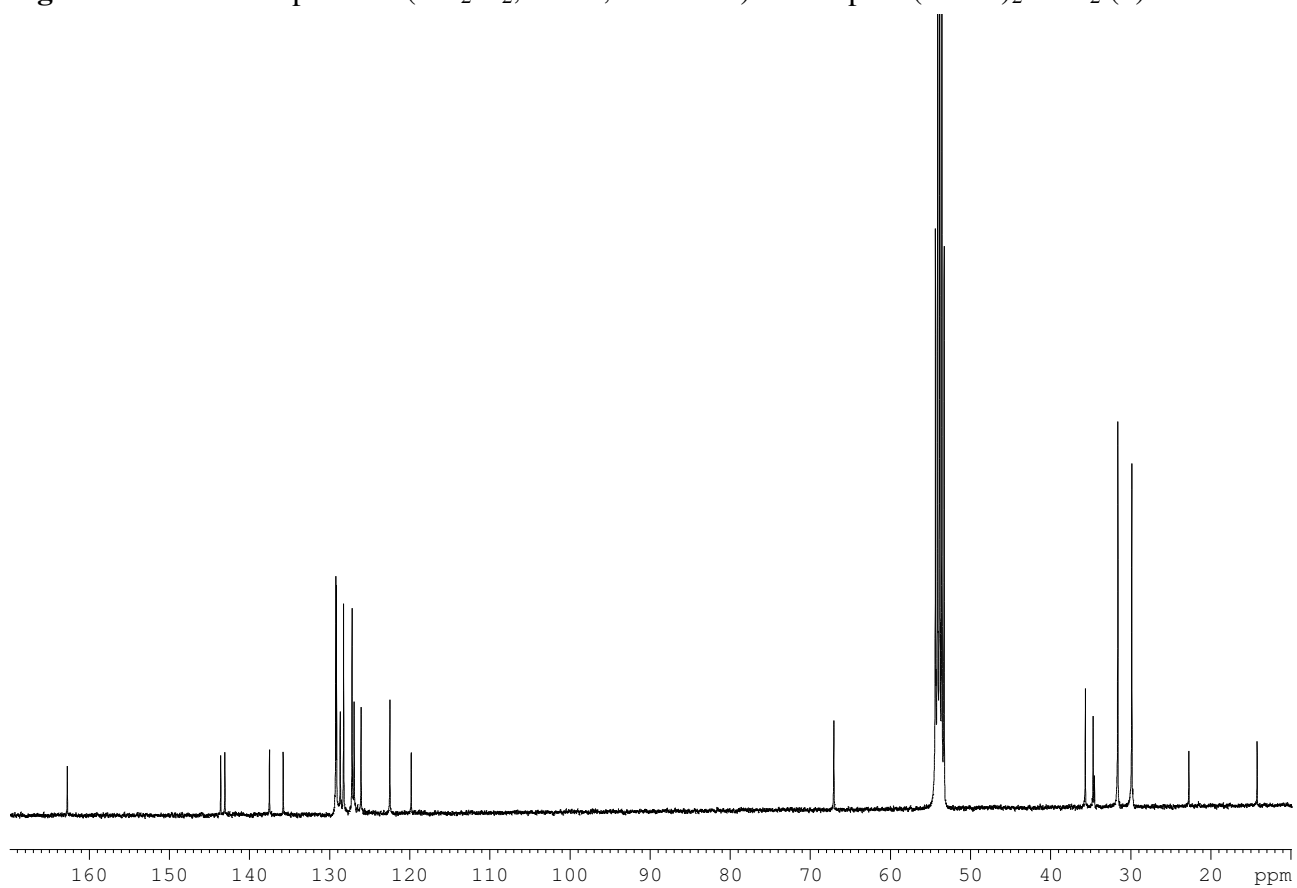

**Figure S7.**  $^{13}\text{C}$  NMR spectrum ( $\text{CD}_2\text{Cl}_2$ , 25 °C, 100 MHz) of complex  $(^t\text{-BuOS})_2\text{ZrBn}_2$  (**3**).

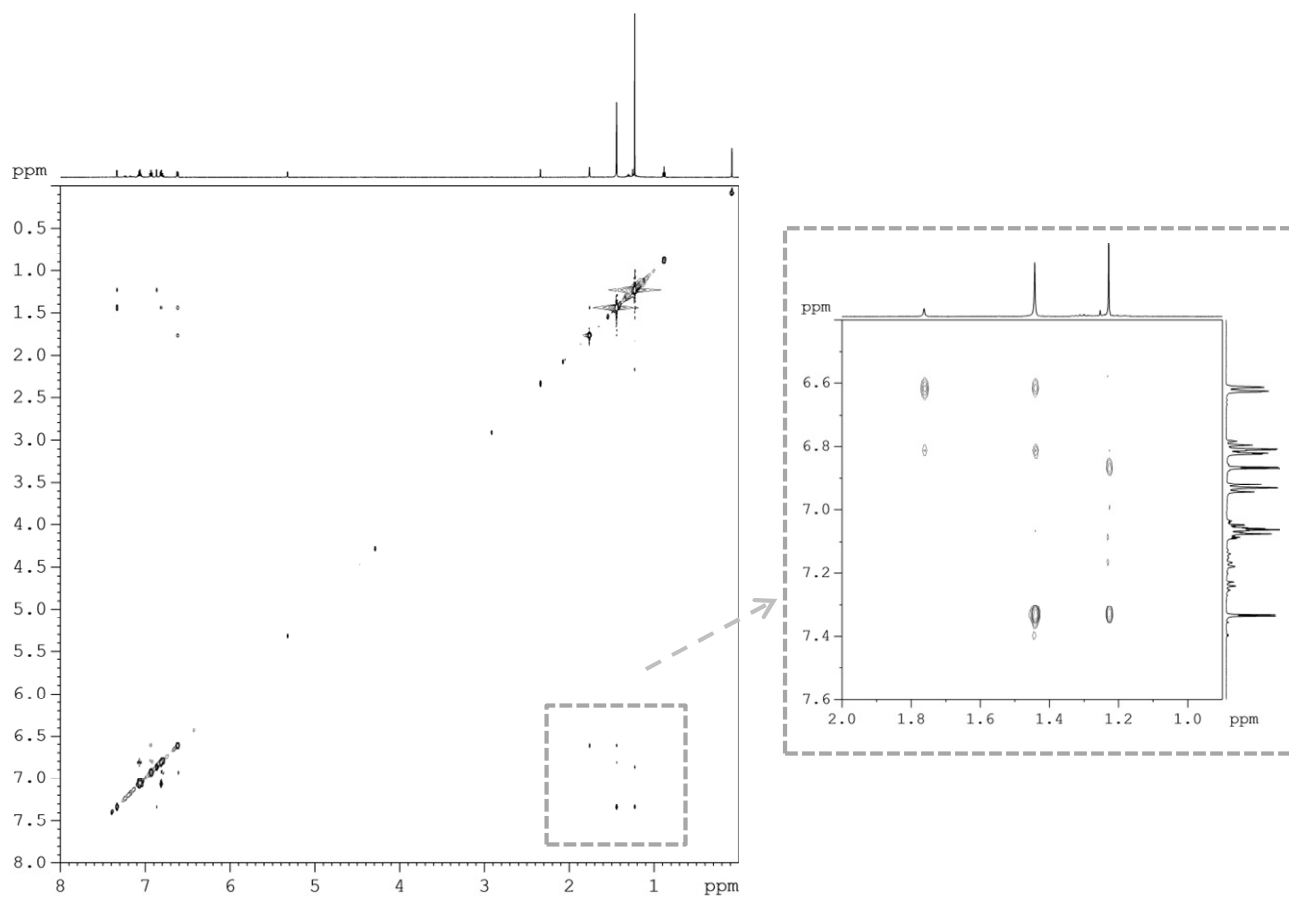

**Figure S8.**  $^1\text{H}$ - $^1\text{H}$  NOESY spectrum ( $\tau_m = 0.400$  s,  $\text{CD}_2\text{Cl}_2$ , 600 MHz) of complex  $(t\text{-BuOS})_2\text{ZrBn}_2$  (**3**) at room temperature.

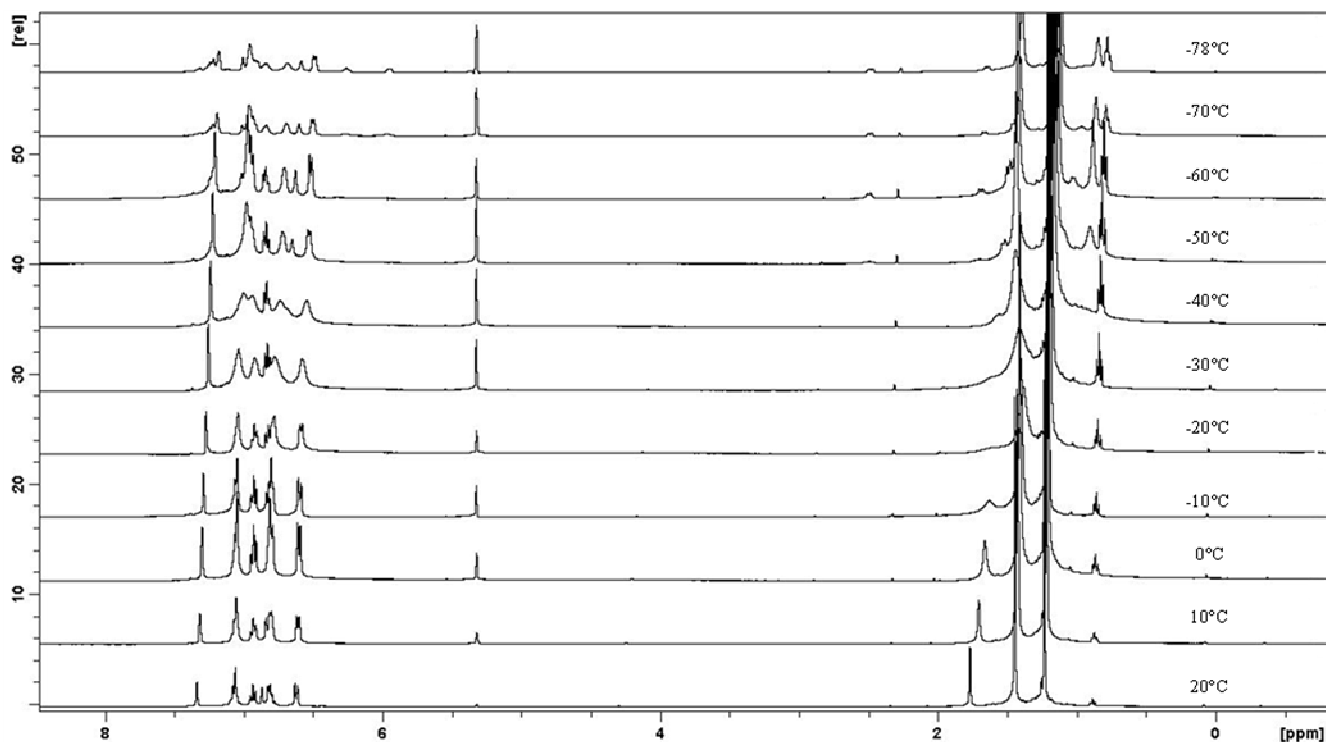

**Figure S9a.** Variable-temperature  $^1\text{H}$  NMR spectra ( $\text{CD}_2\text{Cl}_2$ , 400 MHz) of complex  $(t\text{-BuOS})_2\text{ZrBn}_2$  (**3**).

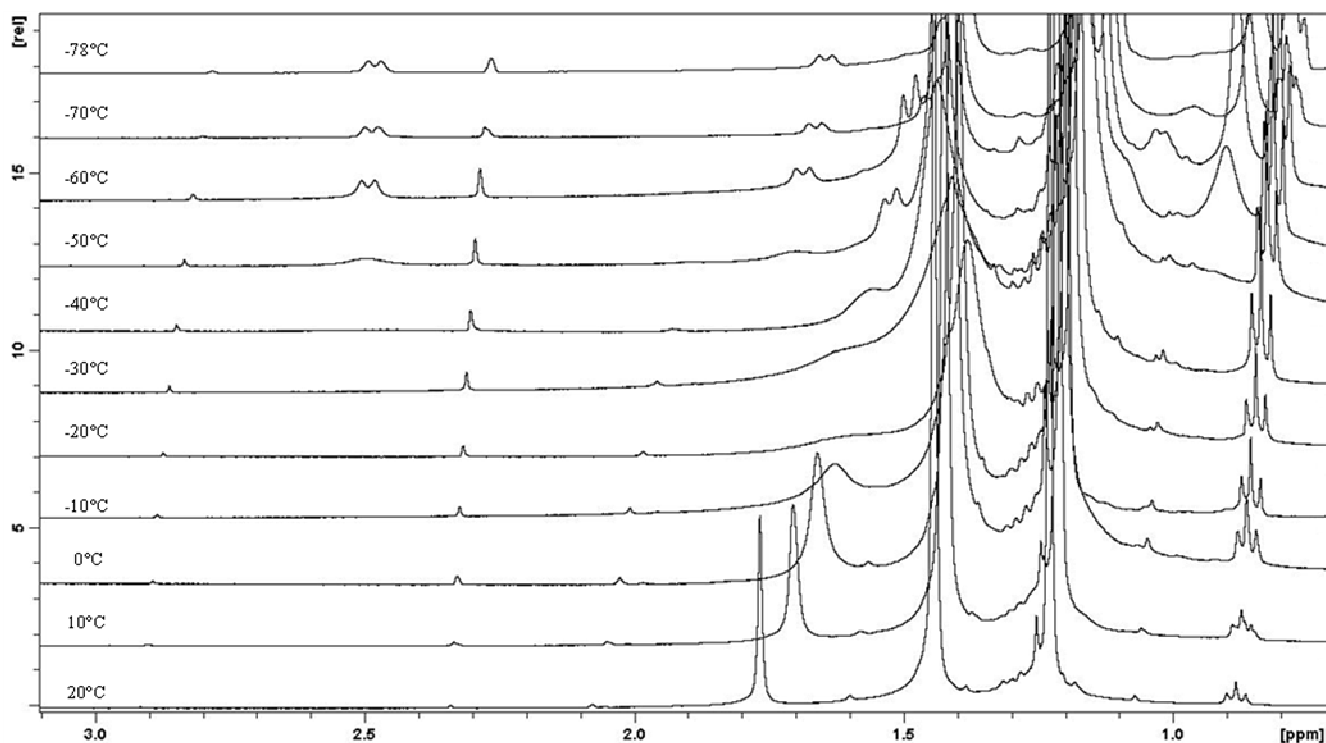

**Figure S9b.** Variable-temperature  $^1\text{H}$  NMR spectra ( $\text{CD}_2\text{Cl}_2$ , 400 MHz) of complex  $(t\text{-BuOS})_2\text{ZrBn}_2$  (**3**), in the region from 0.7 to 3.1 ppm.



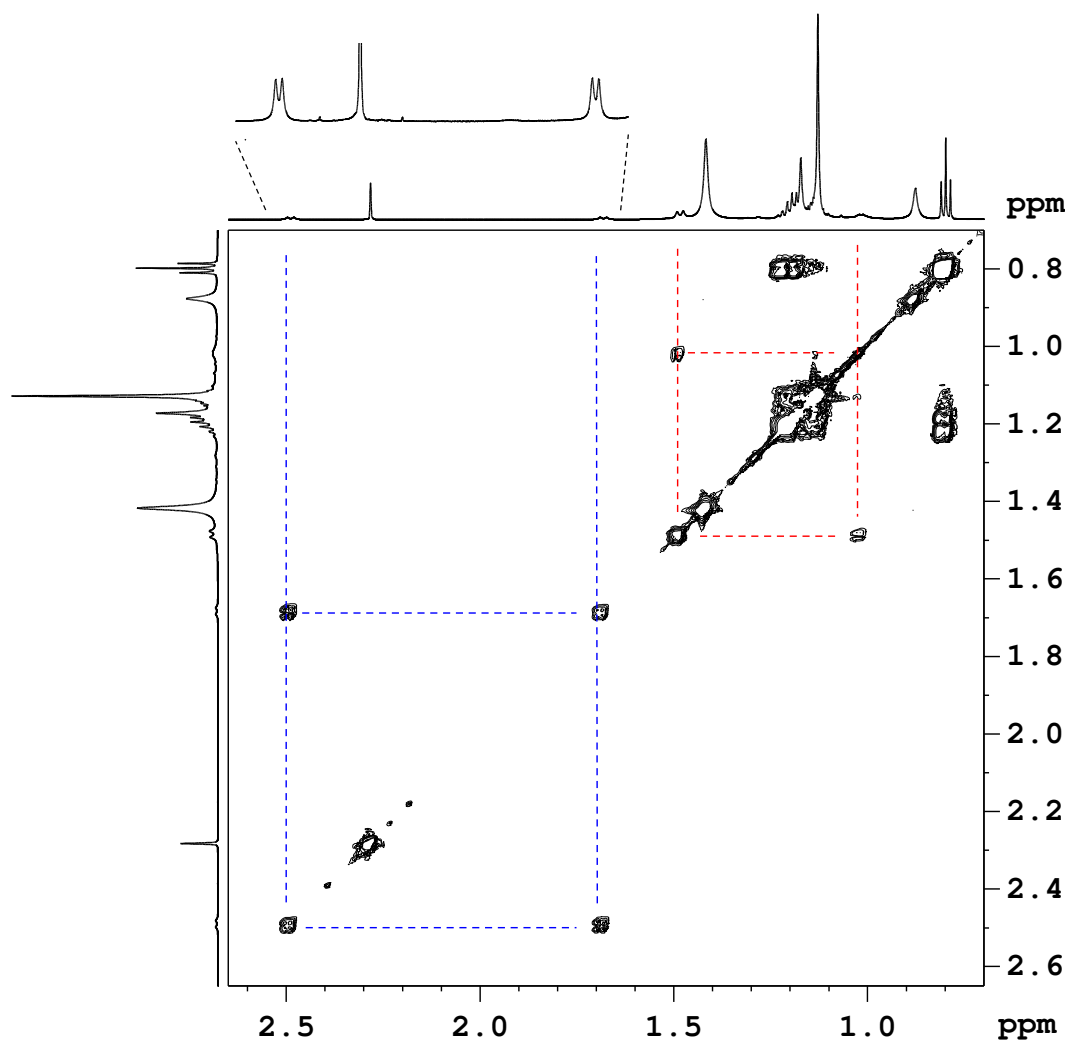

**Figure S10.** COSY spectrum ( $\text{CD}_2\text{Cl}_2$ , 600MHz) of complex  $(t\text{-BuOS})_2\text{ZrBn}_2$  (**3**) showing the scalar coupling of the Zr- $\text{CH}_2$ -Ph resonances at  $-80\text{ }^\circ\text{C}$ .

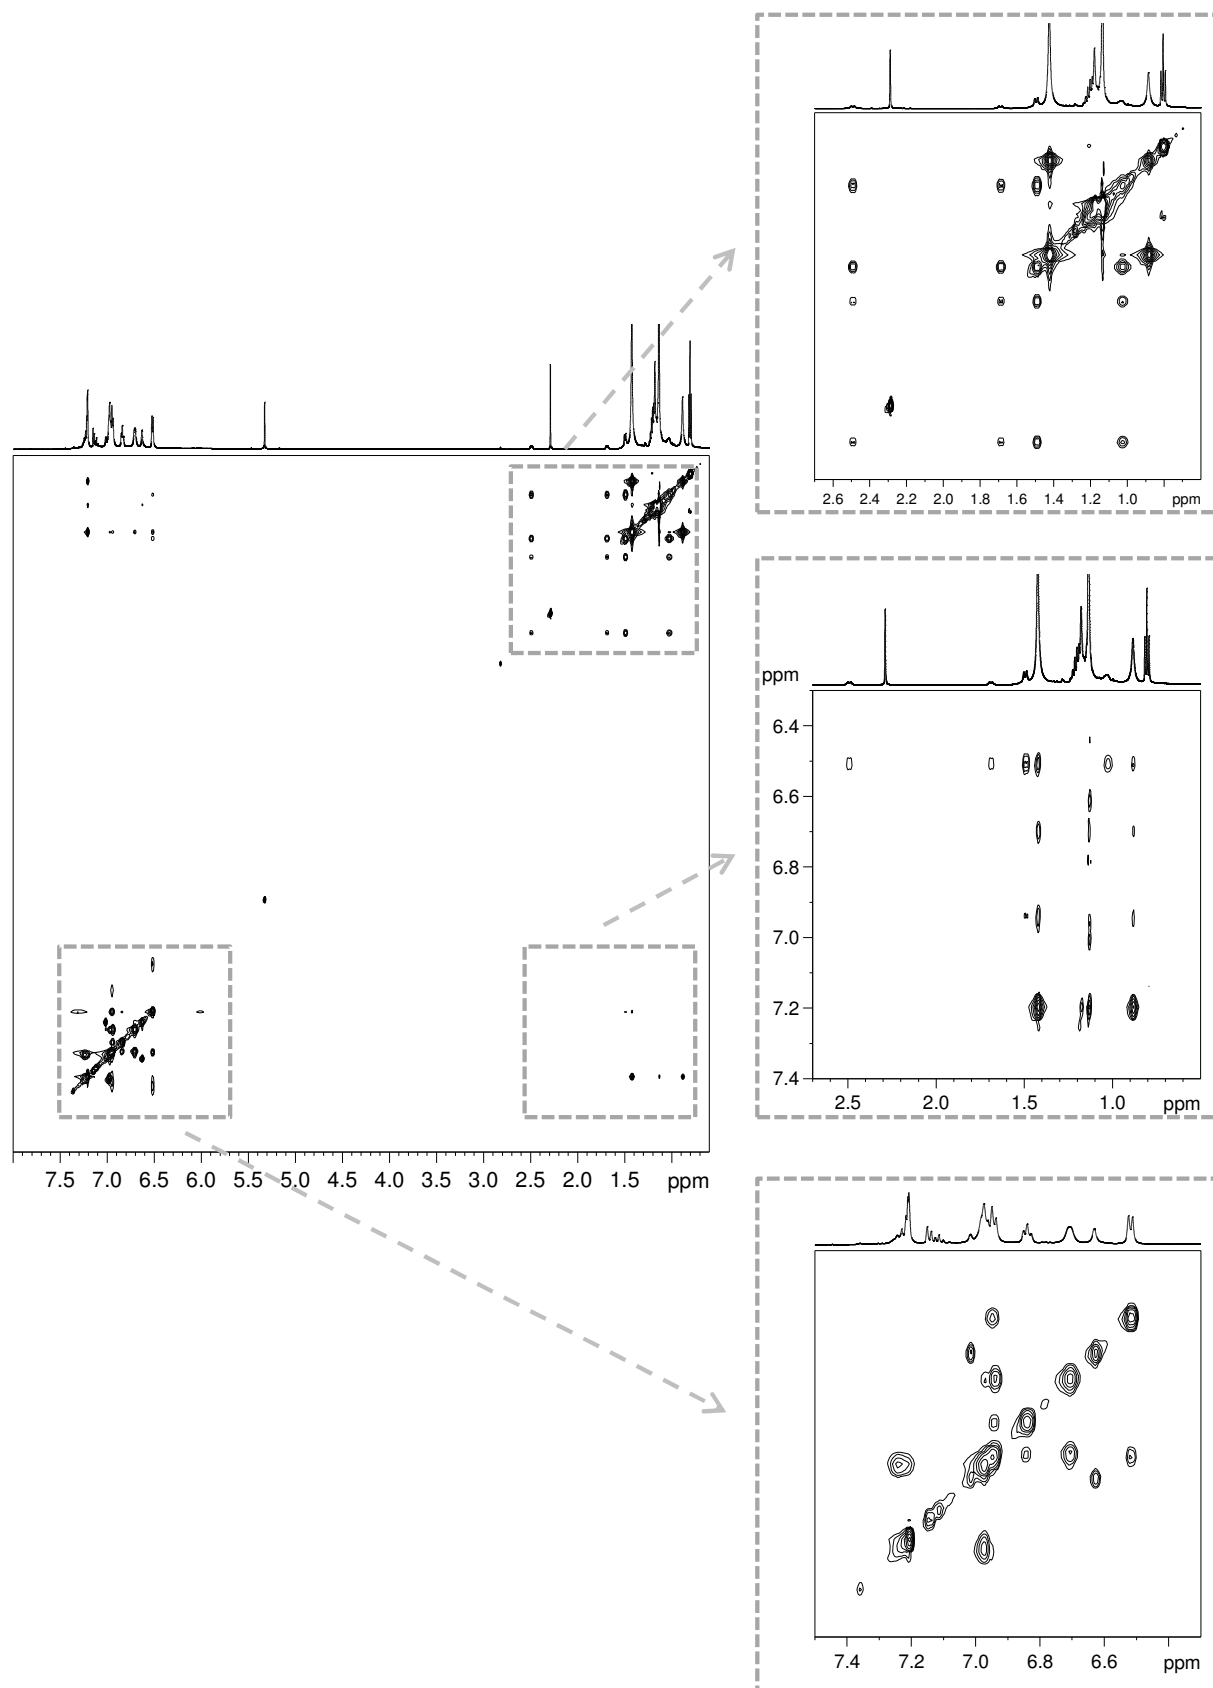

**Figure S11.**  $^1\text{H}$ - $^1\text{H}$  NOESY spectrum ( $\tau_m = 0.400$  s,  $\text{CD}_2\text{Cl}_2$ , 600 MHz) of complex  $(t\text{-BuOS})_2\text{ZrBn}_2$  (**3**) at  $-80$  °C.

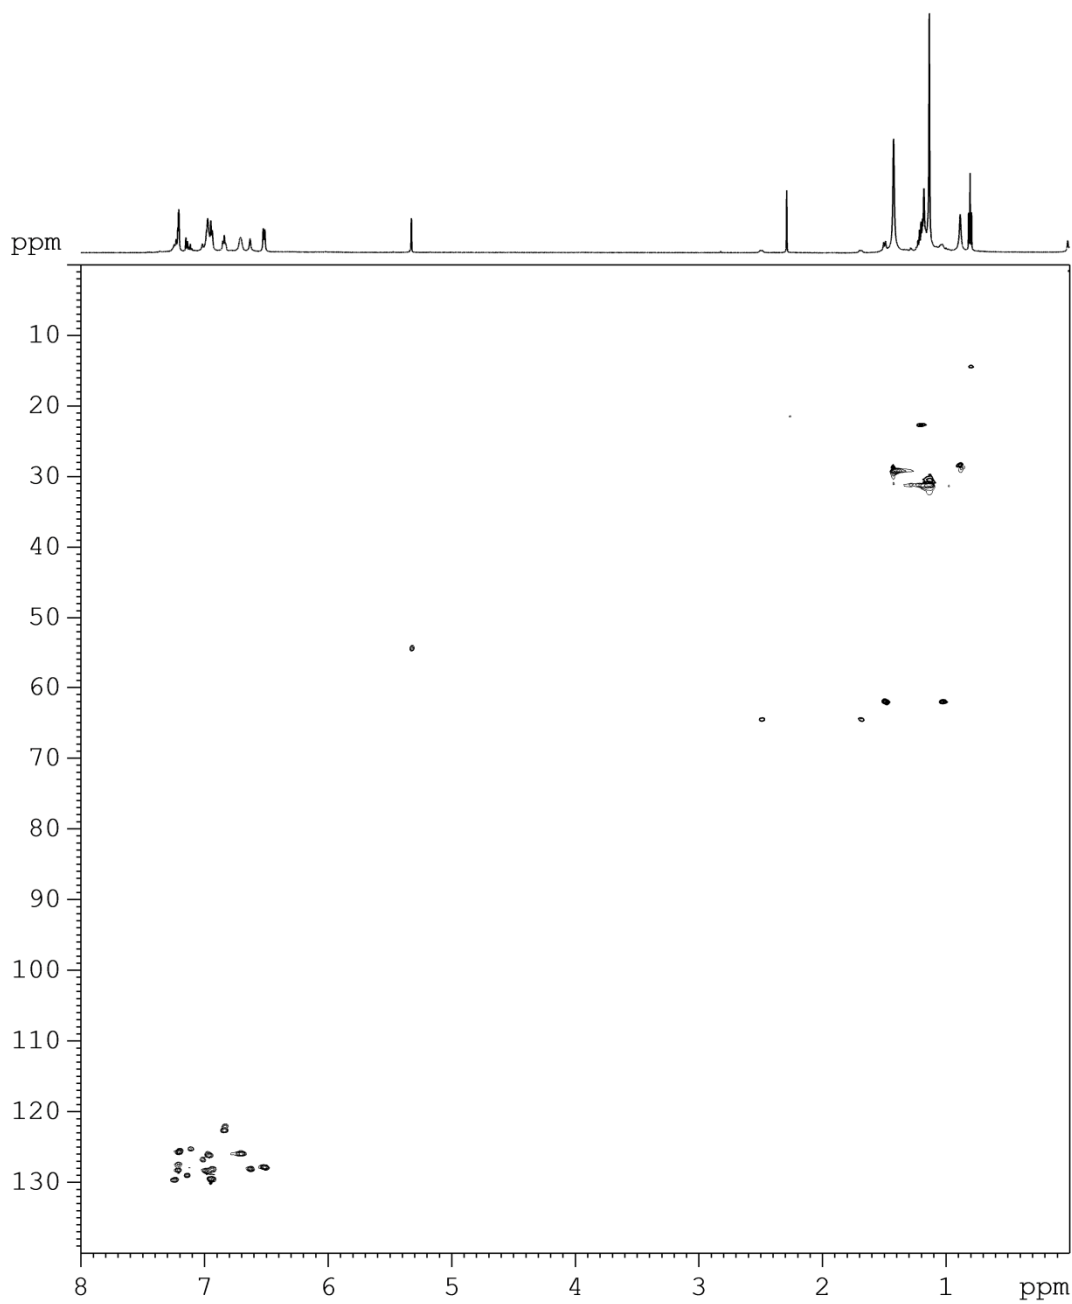

**Figure S12.**  $^1\text{H}$ - $^{13}\text{C}$  HSQC spectrum ( $\text{CD}_2\text{Cl}_2$ , 600 MHz) of complex  $(t\text{-BuOS})_2\text{ZrBn}_2$  (**3**) at  $-80\text{ }^\circ\text{C}$ .

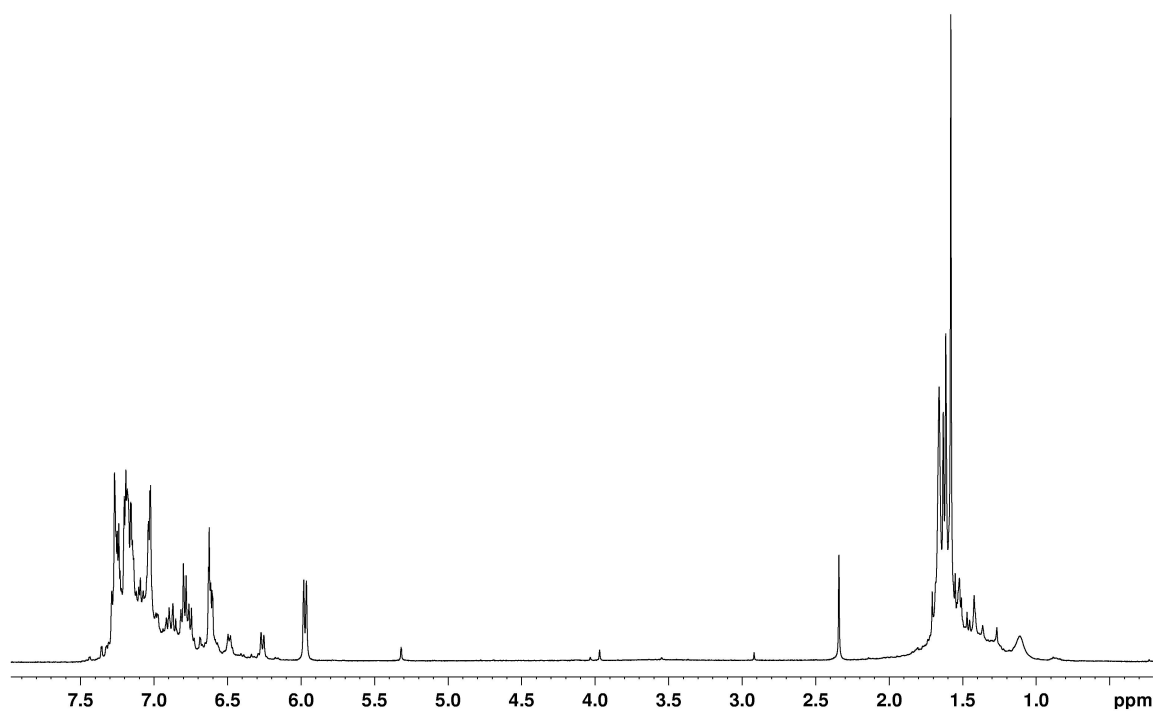

**Figure S13.**  $^1\text{H}$  NMR spectrum ( $\text{CD}_2\text{Cl}_2$ , 25 °C, 400 MHz) of complex  $(^{\text{Cum}}\text{OS})_2\text{ZrBn}_2$  (**4**).

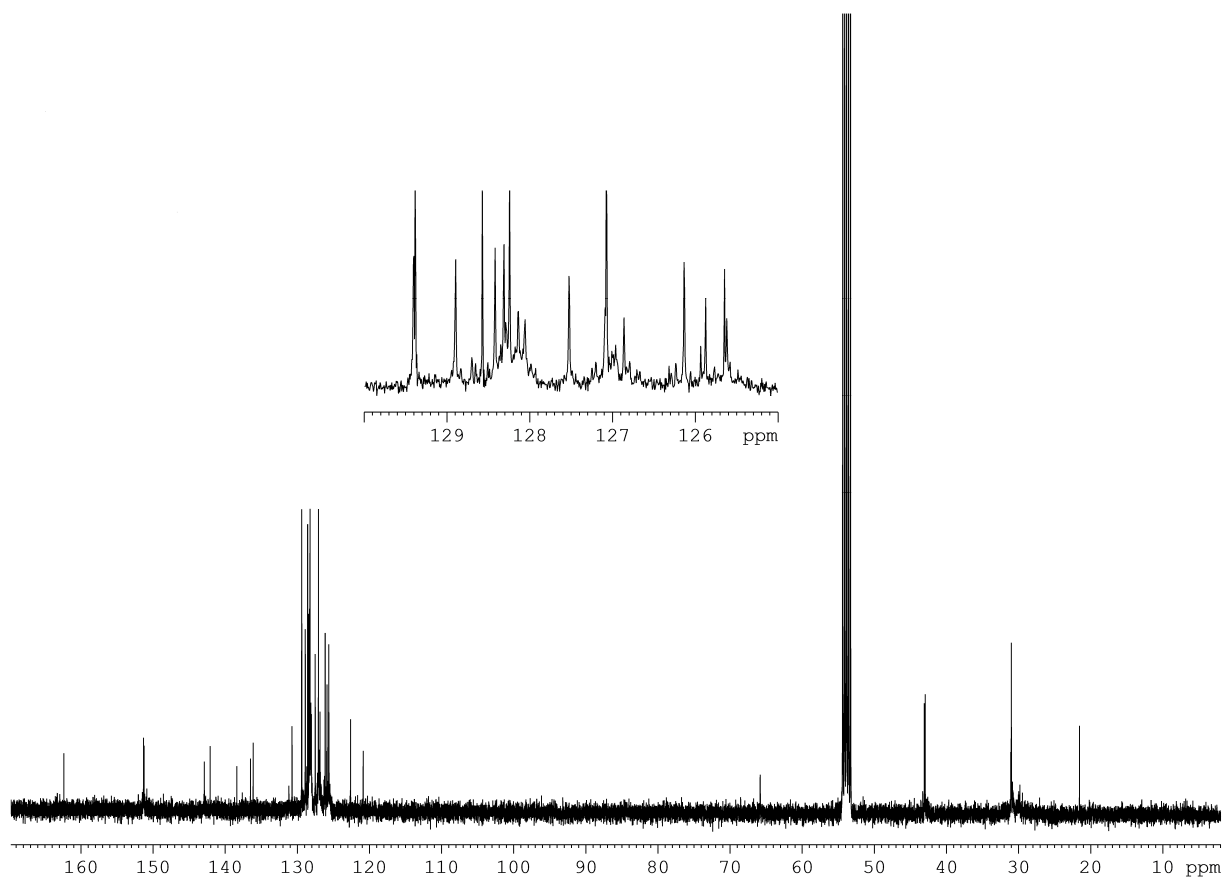

**Figure S14.**  $^{13}\text{C}$  NMR spectrum ( $\text{CD}_2\text{Cl}_2$ , 25 °C, 75 MHz) of complex  $(^{\text{Cum}}\text{OS})_2\text{ZrBn}_2$  (**4**).

**Table S1.** Internal and Free Energy differences (kcal/mol) of the minimum energy structures for the five diastereoisomers of the (OS)<sub>2</sub>MX<sub>2</sub> complexes (M = Ti, X = Cl; M = Zr, X = Me).

|                                | 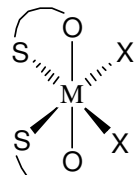  |   |   |   |   |
|--------------------------------|------------------------------------------------------------------------------------|-------------------------------------------------------------------------------------|--------------------------------------------------------------------------------------|--------------------------------------------------------------------------------------|--------------------------------------------------------------------------------------|
| Diastereoisomer                | A                                                                                  | B                                                                                   | C                                                                                    | D                                                                                    | E                                                                                    |
| Symmetry                       | C <sub>2</sub>                                                                     | C <sub>2</sub>                                                                      | C <sub>1</sub>                                                                       | C <sub>2</sub>                                                                       | C <sub>i</sub>                                                                       |
| <b>Titanium</b>                |   |   |   |   |   |
| Minimum Energy structure       |                                                                                    |                                                                                     |                                                                                      |                                                                                      |                                                                                      |
| Imag. freq. <sup>a</sup>       | 0                                                                                  | 0                                                                                   | 0                                                                                    | 0                                                                                    | 2                                                                                    |
| ΔE                             | 0.0                                                                                | 3.9                                                                                 | -1.7                                                                                 | 0.4                                                                                  | 15.5                                                                                 |
| ΔE <sub>ZPE</sub> <sup>b</sup> | 0.0                                                                                | 3.5                                                                                 | -1.8                                                                                 | 0.3                                                                                  | -                                                                                    |
| ΔG <sup>c</sup>                | 0.0                                                                                | 8.3                                                                                 | 3.9                                                                                  | 4.8                                                                                  | -                                                                                    |
| <b>Zirconium</b>               |  |  |  |  |  |
| Minimum Energy structure       |                                                                                    |                                                                                     |                                                                                      |                                                                                      |                                                                                      |
| Imag. freq. <sup>a</sup>       | 0                                                                                  | 0                                                                                   | 0                                                                                    | 0                                                                                    | 3                                                                                    |
| ΔE                             | 0.0                                                                                | 3.8                                                                                 | 2.0                                                                                  | 2.7                                                                                  | 37.6                                                                                 |
| ΔE <sub>ZPE</sub> <sup>b</sup> | 0.0                                                                                | 4.5                                                                                 | 2.3                                                                                  | 3.0                                                                                  | -                                                                                    |
| ΔG <sup>c</sup>                | 0.0                                                                                | 6.2                                                                                 | 3.0                                                                                  | 4.5                                                                                  | -                                                                                    |

<sup>a</sup> Number of imaginary frequencies <sup>b</sup> Zero Point Energy (ZPE) Corrected Energies (at 0 K); <sup>c</sup> Free Energies in gas phase thermodynamically corrected to 298 K.

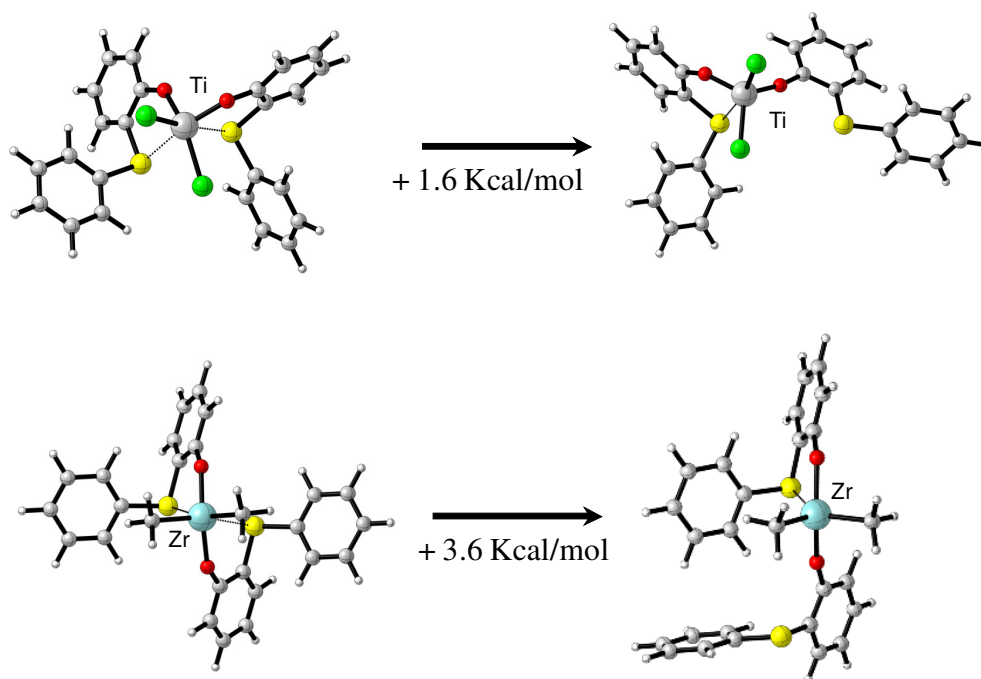

**Figure S15.** The opening ( $\kappa^2 \rightarrow \kappa^1$ ) of one of the OS ligands in the titanium and zirconium  $(OS)_2TiCl_2$  and  $(OS)_2ZrMe_2$  complexes. The stereoisomers C and A were considered as starting species for the titanium and zirconium complexes, respectively.

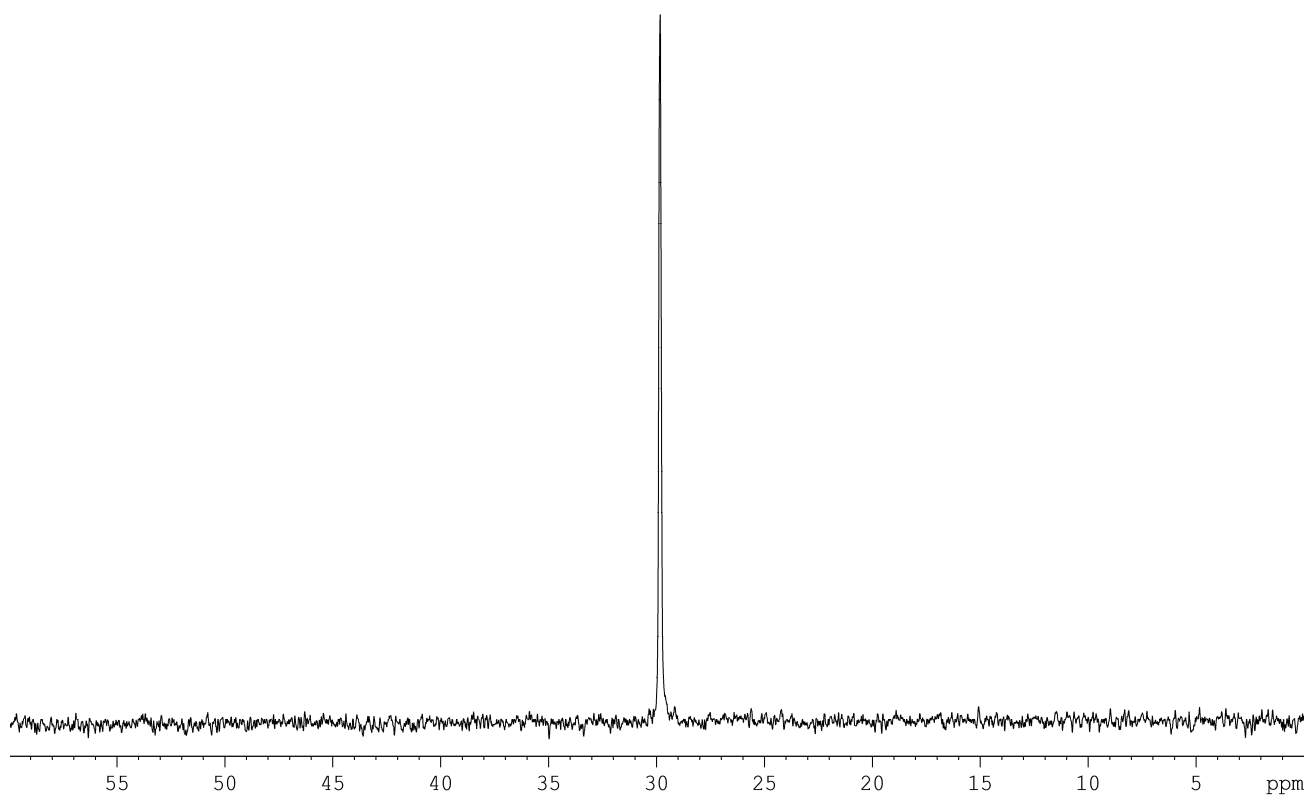

**Figure S16.**  $^{13}\text{C}$  NMR spectrum (TCDE, 110°C, 75 MHz) of polyethylene of run 1, Table 1.

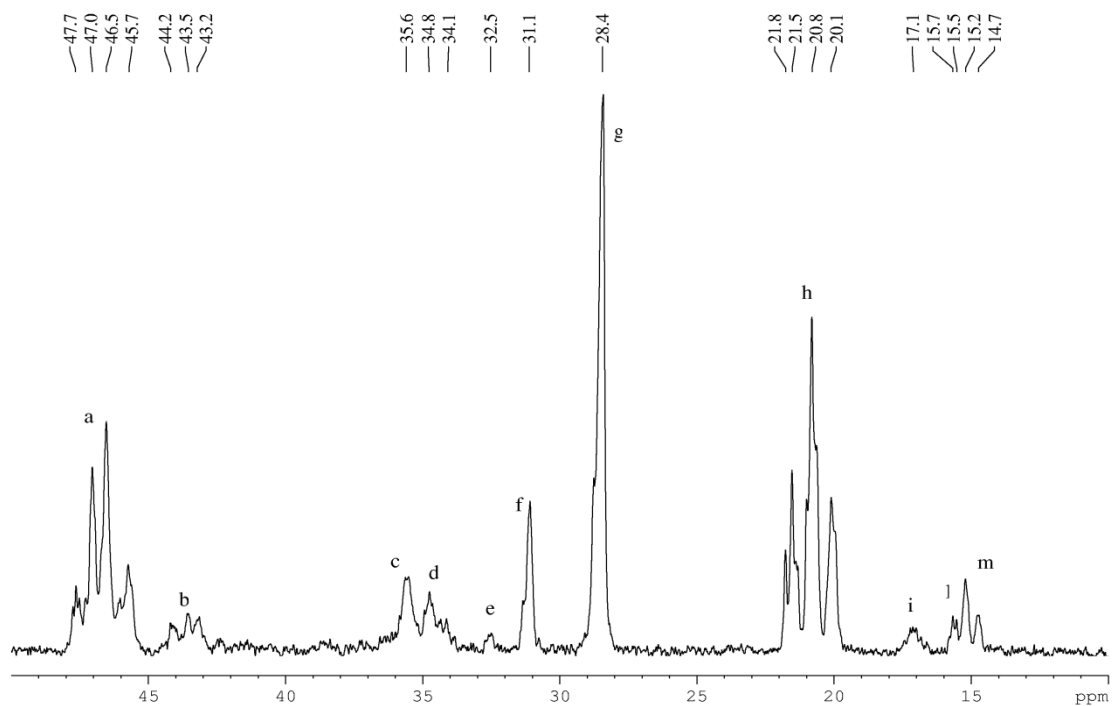

**Figure S17.** Aliphatic region of  $^{13}\text{C}$  NMR spectrum (TCDE, 110°C, 75 MHz) of polypropylene sample of run 1 in Table 2.



**Table S2.**  $^{13}\text{C}$  NMR chemical shift of polypropylene sample and the corresponding literature values for regioirregular polypropylene.<sup>1</sup>

| Line | Chemical shift (ppm from TMS) |                         | H-T                                | H-H                                          | T-T                                                                  | 1-r                                                                                             |
|------|-------------------------------|-------------------------|------------------------------------|----------------------------------------------|----------------------------------------------------------------------|-------------------------------------------------------------------------------------------------|
|      | exp                           | Literature <sup>1</sup> |                                    |                                              |                                                                      |                                                                                                 |
| a    | 45.7-47.6                     | 45.7-47.7               | $S_{\gamma\alpha\alpha\gamma}$ (1) |                                              |                                                                      |                                                                                                 |
|      |                               | 45.7-46.5               |                                    |                                              | $S_{\gamma\alpha\alpha\delta}$ (7)                                   |                                                                                                 |
| b    | 42.9-44.2                     | 43.3-44.1               |                                    | $r_0\text{-}S_{\beta\alpha\alpha\gamma}$ (4) |                                                                      | $r_0\text{-}S_{\beta\alpha\alpha\gamma}$ (19)                                                   |
|      |                               | 40.9-42.3               |                                    | $m_0\text{-}S_{\beta\alpha\alpha\gamma}$ (4) |                                                                      |                                                                                                 |
|      |                               | 36.8-39.1               |                                    |                                              |                                                                      | $r_0\text{-}T_{\delta\gamma\alpha\gamma}$ (15)                                                  |
|      |                               | 36.5                    |                                    |                                              |                                                                      | $r_1\text{-}S_{\gamma\alpha\beta\gamma}$ (13)                                                   |
| c    | 35.6                          | 35.4-35.6               |                                    | $m_0\text{-}T_{\alpha\beta}$ (5)             | $r_1\text{-}S_{\gamma\alpha\beta\delta}$ (10)                        | $m_1\text{-}S_{\gamma\alpha\beta\gamma}$ (13)                                                   |
| d    | 34.1-34.8                     | 34.2-34.8               |                                    | $r_0\text{-}T_{\alpha\beta}$ (5)             | $m_1\text{-}S_{\gamma\alpha\beta\delta}$ (10)                        | $r_0\text{-}T_{\delta\alpha\beta\delta}$ (17)                                                   |
| e    | 32.6                          | 32.6                    |                                    |                                              |                                                                      | $r_0\text{-}S_{\delta\beta\alpha\beta}$ (14)                                                    |
| f    | 31.1                          | 31.1-31.3               |                                    |                                              | $T_{\delta\beta\gamma\delta+}$ (8)                                   | $T_{\delta\beta\gamma\delta}$ (11)                                                              |
| g    | 28.4                          | 28.3-28.4               | $T_{\beta\beta}$ (2)               |                                              |                                                                      |                                                                                                 |
| h    | 20.1-21.8                     | 20.1-21.7               | $P_{\beta\beta}$ (3)               |                                              |                                                                      |                                                                                                 |
|      |                               | 20.1-20.9               |                                    |                                              | $m_1\text{-}P_{\beta\gamma}$ (9)<br>$r_1\text{-}P_{\beta\gamma}$ (9) | $m_1\text{-}P_{\delta\beta\gamma\delta}$ (12)<br>$r_1\text{-}P_{\delta\beta\gamma\delta}$ (12)  |
| i    | 16.8-17.2                     | 16.6-17.2               |                                    | $m_0\text{-}P_{\alpha\beta}$ (6)             |                                                                      |                                                                                                 |
| l    | 15.5-17.5                     |                         |                                    |                                              |                                                                      |                                                                                                 |
| m    | 14.7-15.2                     | 14.7-15.1               |                                    | $r_0\text{-}P_{\alpha\beta}$ (6)             |                                                                      | $r_0\text{-}P_{\delta\gamma\alpha\gamma}$ (16)<br>$r_0\text{-}P_{\delta\alpha\beta\delta}$ (18) |
|      |                               |                         |                                    |                                              |                                                                      |                                                                                                 |

The table contains the chemical shifts of peaks observed in the  $^{13}\text{C}$  spectrum of PP obtained from run 1 Table2. The observed chemical shifts are listed in the column **exp**, and compared to those reported in literature and listed in the column **Literature**. The letters in column **Line** refer to Figure S17 and the numbers reported in brackets refer to the Figure S18.

1) Head-to tail sequence

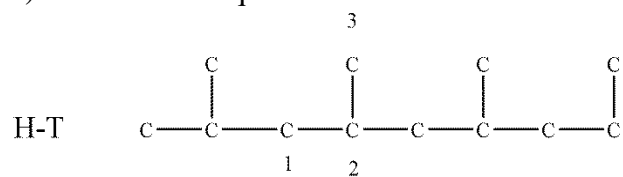

2) Isolated head-to-head regio-error

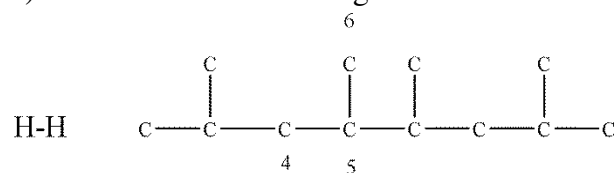

3) Isolated tail-to-tail regio-error

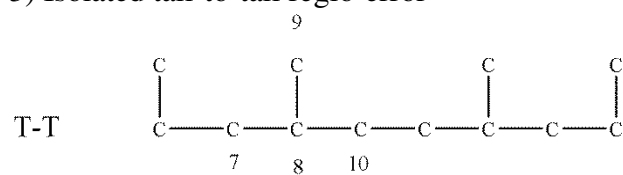

4) Single inverted unit in the head-to tail sequence

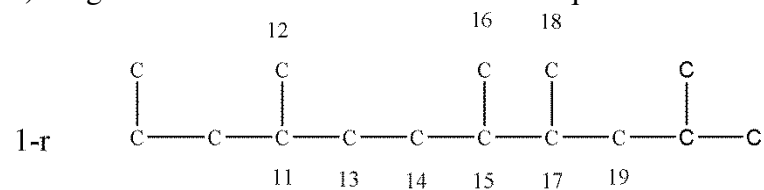

**Figure S18.** Possible modes of 2,1 insertion during the propylene polymerization.

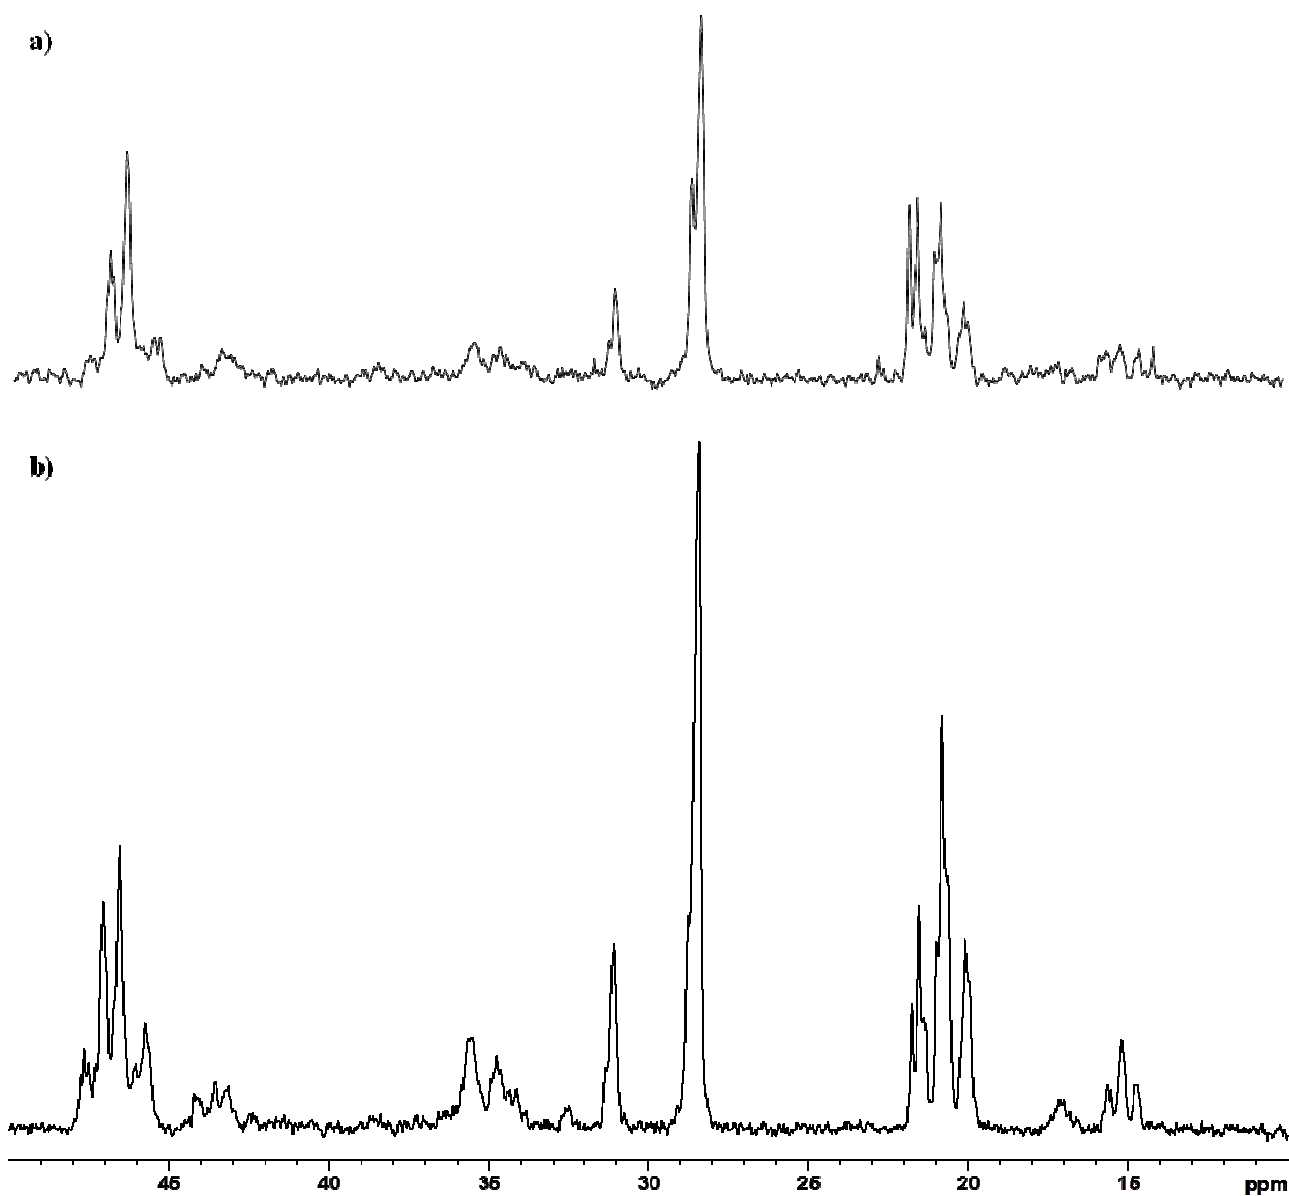

**Figure S19**  $^{13}\text{C}$  NMR spectra (TCDE, 110 °C, 75 MHz) of polypropylene samples of **run 4** (a) and **1** (b) Table 2.

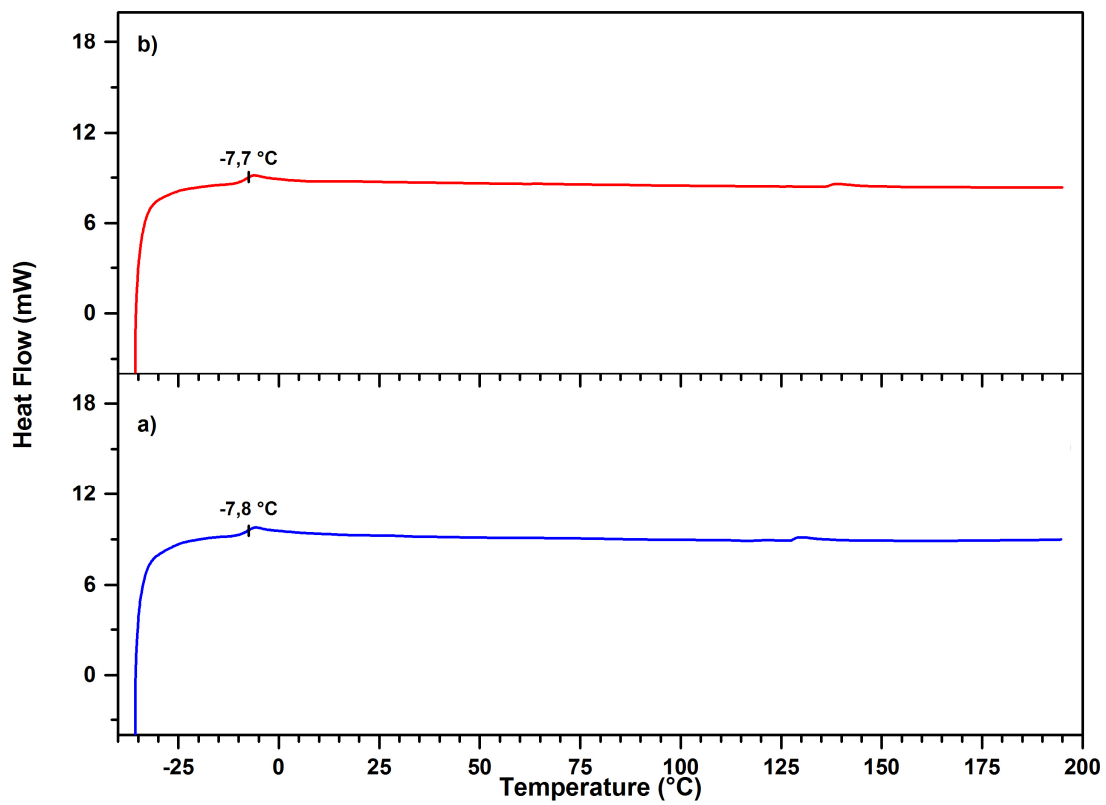

**Figure S20.** DSC thermograms for polypropylene samples of run 1 (a) and 3 (b) Table 2. Heating rate =10°C min<sup>-1</sup>

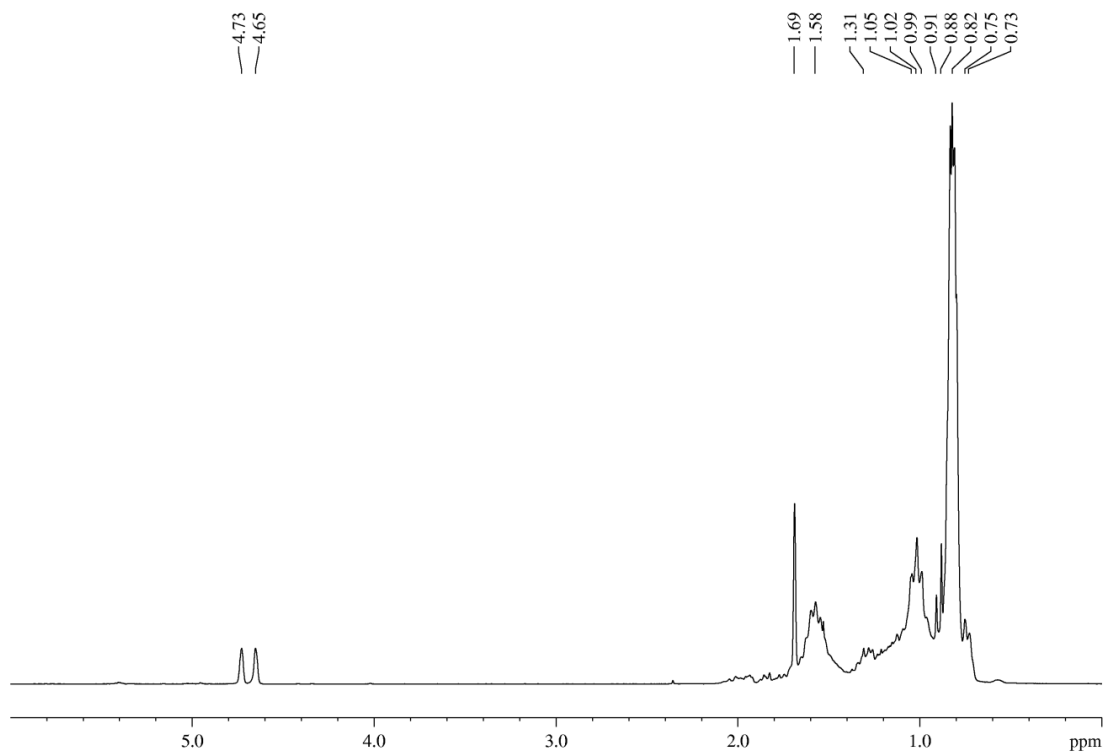

**Figure S21.**  $^1\text{H}$  NMR spectrum ( $\text{CDCl}_3$ , 25  $^\circ\text{C}$ , 300 MHz) of oligomers obtained from the run 2 Table 2.

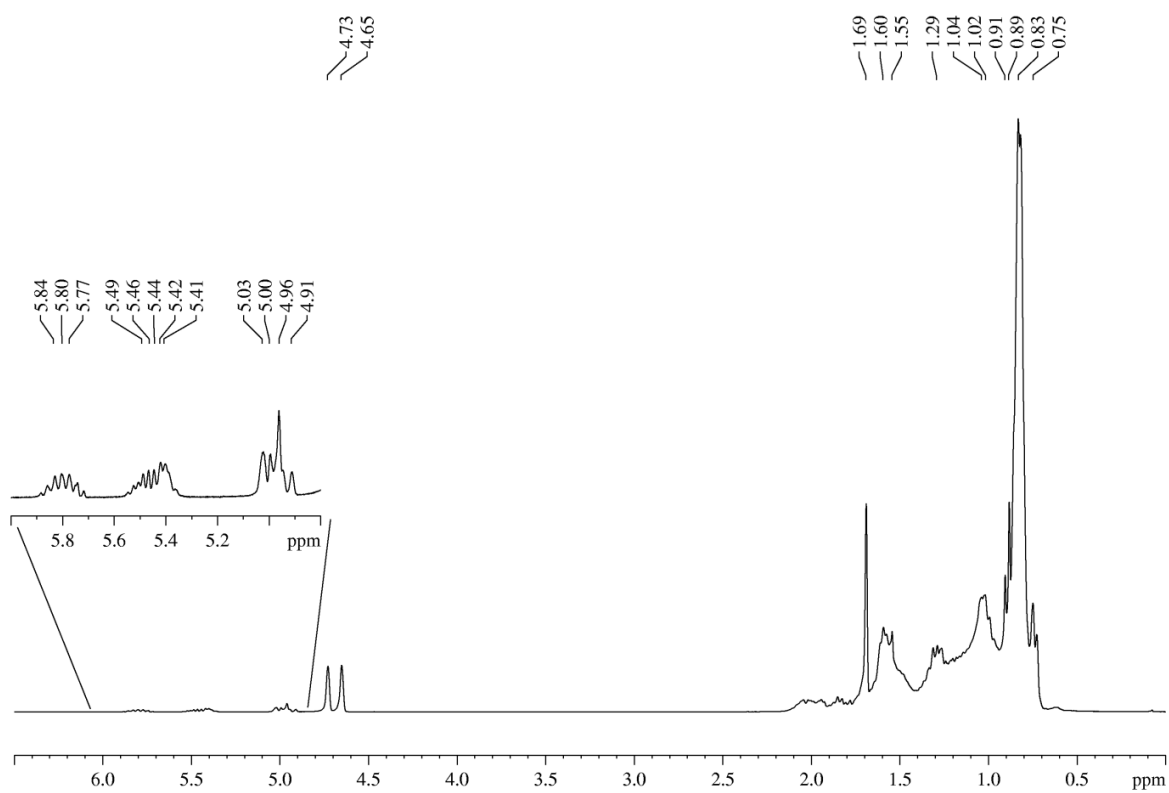

**Figure S22.**  $^1\text{H}$  NMR spectrum ( $\text{CDCl}_3$ , 25  $^\circ\text{C}$ , 300 MHz) of oligomers obtained from the run 3 Table 2.

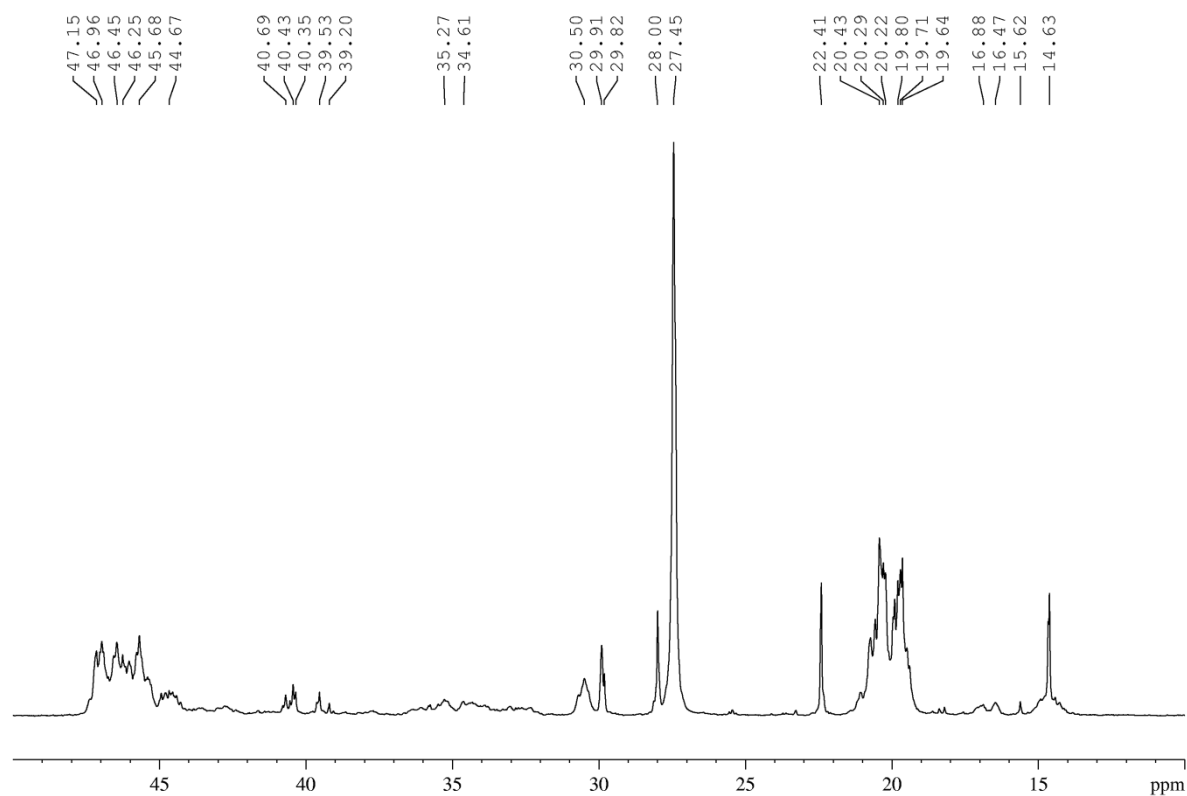

**Figure S23.** Aliphatic region of  $^{13}\text{C}$  NMR spectrum ( $\text{CDCl}_3$ , 25 °C, 75 MHz) of oligomers obtained from the run 2 Table 2.

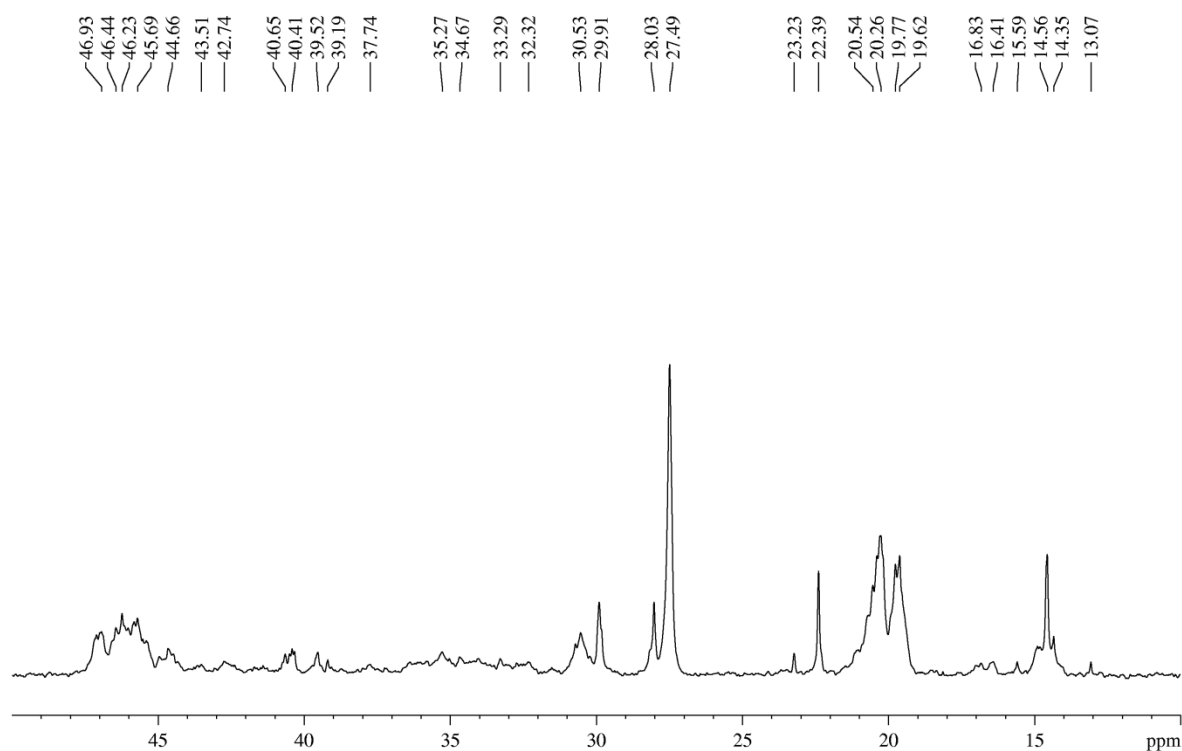

**Figure S24.** Aliphatic region of  $^{13}\text{C}$  NMR spectrum ( $\text{CDCl}_3$ , 25 °C, 75.5 MHz) of oligomers obtained from the run 3 Table 2.

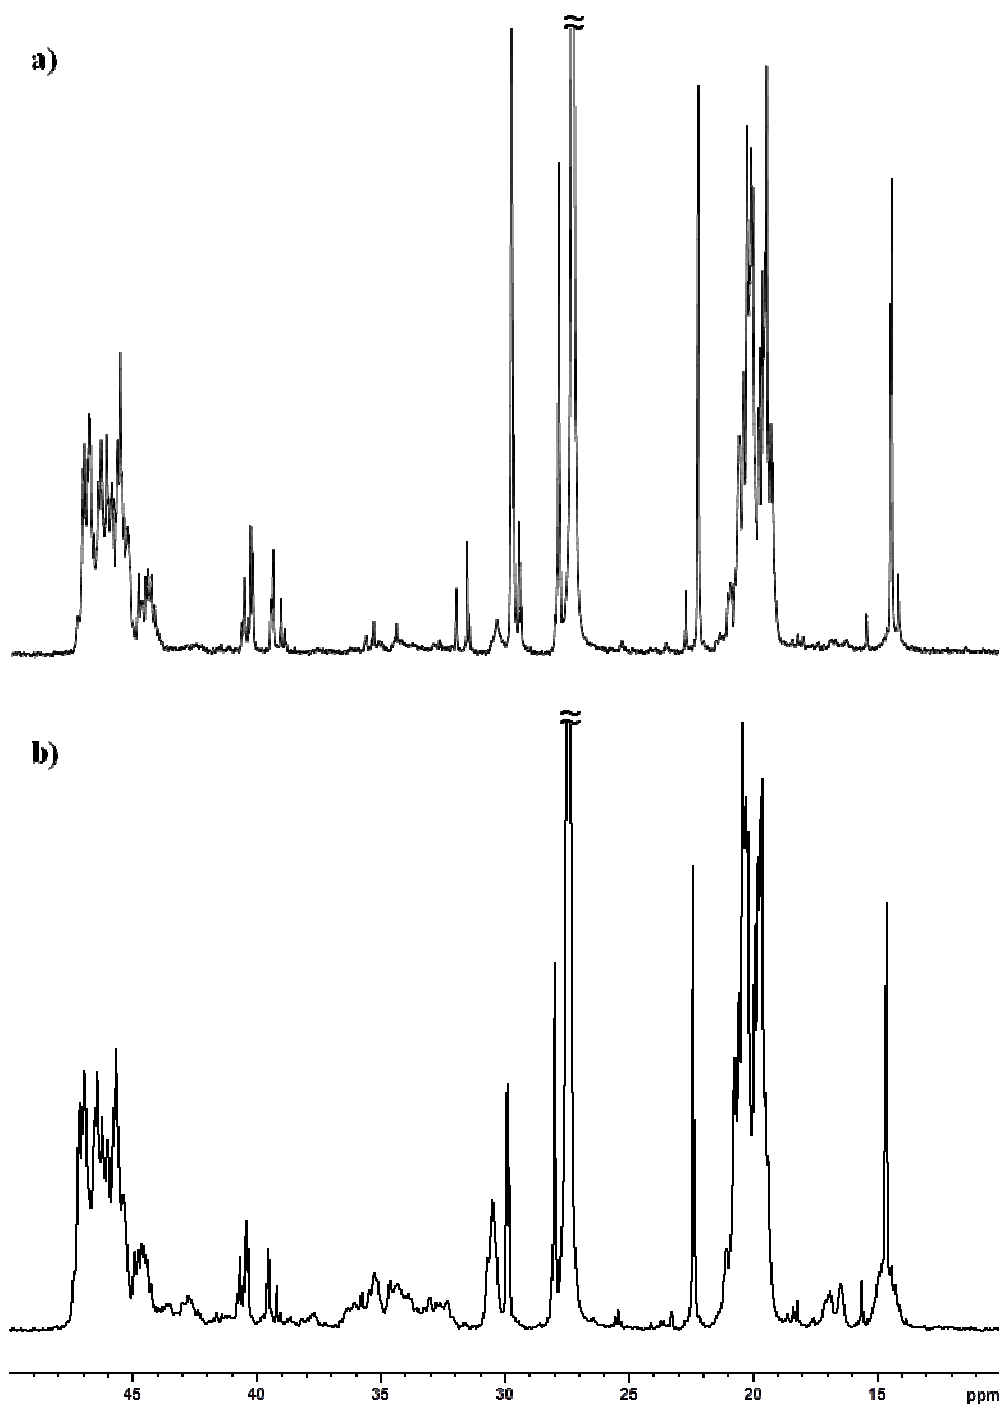

**Figure S25.**  $^{13}\text{C}$  NMR spectra ( $\text{CDCl}_3$ , 25 °C, 75 MHz) of oligomers samples of run 5 (a) and 2 (b) Table 2.

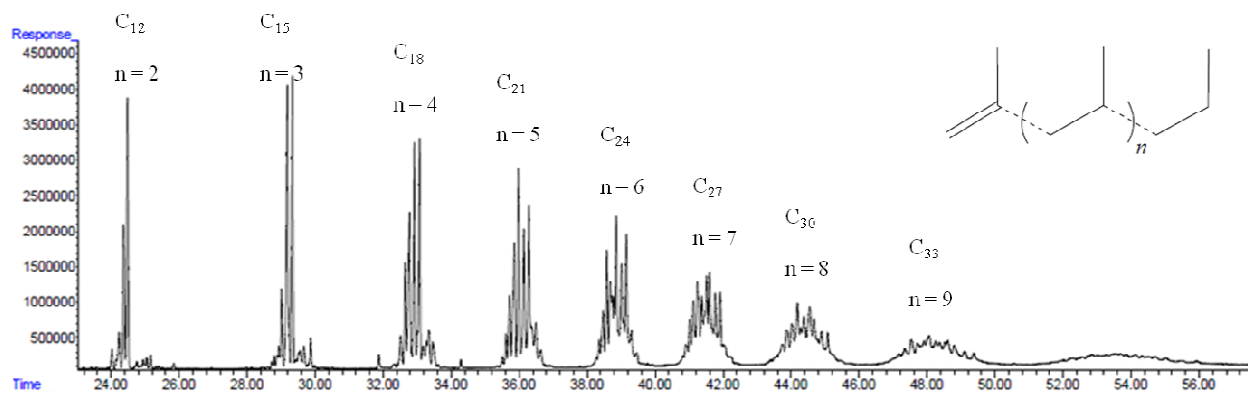

**Figure S26.** GC trace of the oligomers sample from run 2 Table 2.



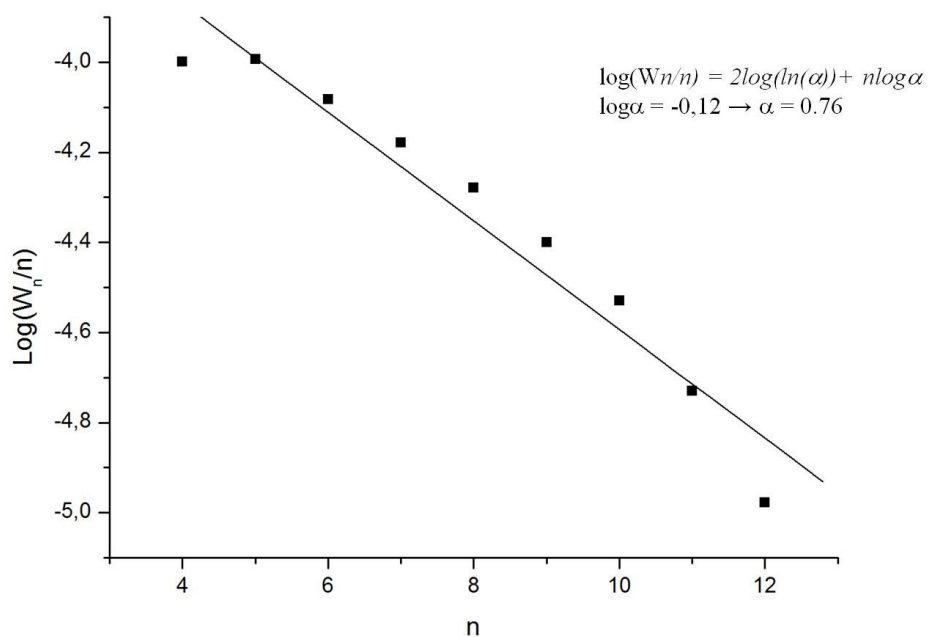

**Figure S27.** Schulz-Flory distribution of oligomers sample of run 2 Table 2. (R = 0.969).

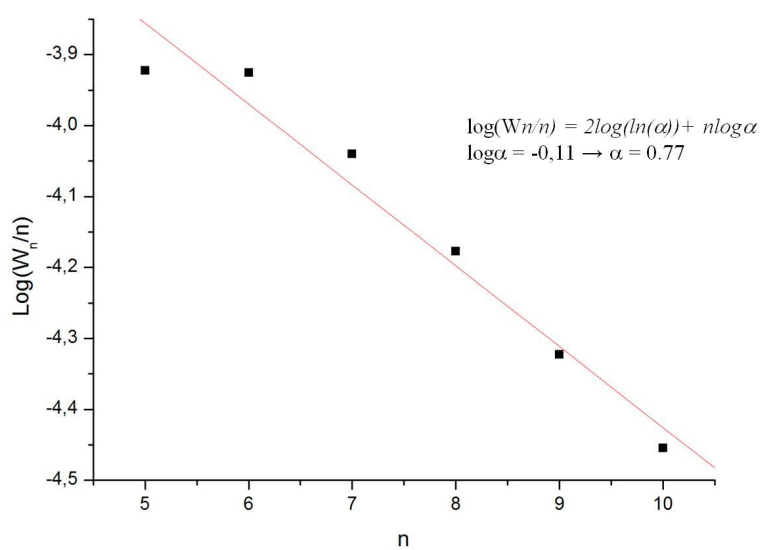

**Figure S28.** Schulz-Flory distribution of oligomers sample of run 3 Table 2. (R = 0.979).

## References

- 1) T. Asakura, N. Nakayama, M. Demura, A. Asano, *Macromolecules* 1992, **25**, 4876-4881.
- 2) L. Resconi, L. Cavallo, A. Fait, F. Piemontesi, *Chem. Rev.* 2000, **100**, 1253-1345.
